# Supplementary material for: Benefits and limitations of business process model notation in modelling patient healthcare trajectory: a scoping review protocol
Source: PubMed Central journal article supplement — BMJ Open. 2022 May 27;12(5):e060357. doi: 10.1136/bmjopen-2021-060357 (PMC9152926; doi:10.1136/bmjopen-2021-060357), 2022-05-27
Supplement: bmjopen-2021-060357.draft_revisions.pdf [file bmjopen-2021-060357.draft_revisions.pdf]

# BMJ Open

BMJ Open is committed to open peer review. As part of this commitment we make the peer review history of every article we publish publicly available.

When an article is published we post the peer reviewers' comments and the authors' responses online. We also post the versions of the paper that were used during peer review. These are the versions that the peer review comments apply to.

The versions of the paper that follow are the versions that were submitted during the peer review process. They are not the versions of record or the final published versions. They should not be cited or distributed as the published version of this manuscript.

BMJ Open is an open access journal and the full, final, typeset and author-corrected version of record of the manuscript is available on our site with no access controls, subscription charges or pay-per-view fees (<http://bmjopen.bmj.com>).

If you have any questions on BMJ Open's open peer review process please email [info.bmjopen@bmj.com](mailto:info.bmjopen@bmj.com)

# BMJ Open

## Benefits and Limitations of Business Process Model Notation in Modelling Patient Healthcare Trajectory: A Scoping Review Protocol

|                               |                                                                                                                                                                                                                                                                                                                                                                                                                                                                                                                                  |
|-------------------------------|----------------------------------------------------------------------------------------------------------------------------------------------------------------------------------------------------------------------------------------------------------------------------------------------------------------------------------------------------------------------------------------------------------------------------------------------------------------------------------------------------------------------------------|
| Journal:                      | <i>BMJ Open</i>                                                                                                                                                                                                                                                                                                                                                                                                                                                                                                                  |
| Manuscript ID                 | bmjopen-2021-060357                                                                                                                                                                                                                                                                                                                                                                                                                                                                                                              |
| Article Type:                 | Protocol                                                                                                                                                                                                                                                                                                                                                                                                                                                                                                                         |
| Date Submitted by the Author: | 19-Dec-2021                                                                                                                                                                                                                                                                                                                                                                                                                                                                                                                      |
| Complete List of Authors:     | Kassim, Said; Universite Laval; Laval University Department of Management,<br>Gartner, Jean-Baptiste; Université Laval, Département de management<br>Labbé, Laurence; Laval University, Management<br>Landa, Paolo; Laval University, Operations and Decision Systems Department<br>Paquet, Catherine; Université Laval Département de management<br>Bergeron, Frédéric; Université Laval<br>Lemaire, Célia; EM Strasbourg Business School<br>Côté, André; Universite Laval Departement de management, Département de management |
| Keywords:                     | Quality in health care < HEALTH SERVICES ADMINISTRATION & MANAGEMENT, Health informatics < BIOTECHNOLOGY & BIOINFORMATICS, Organisation of health services < HEALTH SERVICES ADMINISTRATION & MANAGEMENT, Protocols & guidelines < HEALTH SERVICES ADMINISTRATION & MANAGEMENT                                                                                                                                                                                                                                                   |
|                               |                                                                                                                                                                                                                                                                                                                                                                                                                                                                                                                                  |

SCHOLARONE™  
Manuscripts

# 1 Benefits and Limitations of Business Process Model Notation in Modelling

## 2 Patient Healthcare Trajectory: A Scoping Review Protocol

### 3 Running title: Modelling Patient Healthcare Trajectory using BPMN

4 Kassim Said Abasse<sup>1,2,3,4,5</sup>, Jean-Baptiste Gartner<sup>1,2,3,5</sup>, Laurence Labbé<sup>1,2</sup>, Paolo Landa<sup>6\*</sup>,

5 Catherine Paquet<sup>3,8,9</sup>, Frédéric Bergeron<sup>10</sup>, Célia Lemaire<sup>11</sup>, André Côté<sup>1,2,3,4,5</sup>.

6 <sup>1</sup>Département de management, Faculté des sciences de l'administration, Université Laval,  
7 Québec, G1V 0A6, Canada.

8 <sup>2</sup>Centre de recherche en gestion des services de santé, Université Laval, Québec, G1V 0A6,  
9 Canada.

10 <sup>3</sup>Centre de recherche du CHU de Québec, Université Laval, Québec, G1V 0A6, Canada

11 <sup>4</sup>VITAM, Centre de recherche en santé durable, Université Laval, Québec, G1V 0A6, Canada.

12 <sup>5</sup>Centre de recherche du CISSS de Chaudière-Appalaches, Québec, G1V 0A6, Canada.

13 <sup>6</sup>Département d'opérations et systèmes de décision, Faculté des sciences de l'administration  
14 Université Laval, Québec, G1K 7P4, Canada

15 <sup>8</sup>Département de marketing, Faculté des sciences de l'administration, Université Laval,  
16 Québec, G1V 0A6, Canada.

17 <sup>9</sup>Centre NUTRISS-Nutrition, Santé et société Université Laval, Québec, G1V 0A6, Canada.

18 <sup>10</sup>Bibliothèque, Direction des services-conseils, Université Laval, Québec, G1V 0A6, Canada

19 <sup>11</sup>Université de Strasbourg, EM Strasbourg-Business School, HuManiS, Strasbourg, France.

#### 21 \*Corresponding Author

22 Paolo Landa, Ph.D

23 Professeur Adjoint

24 Département d'opérations et systèmes de décision

25 Faculté des sciences de l'administration

26 Université Laval, Québec, QC, G1V 0A6, Canada

27 Local 2421, Tel :(+1)418-656-2131 (Ext. 413389)

28 Email: [Paolo.Landa@fsa.ulaval.ca](mailto:Paolo.Landa@fsa.ulaval.ca).

1  
2  
3 46 **Abstract**

47 **Introduction:** The adoption of business process model notation (BPMN) in modelling  
48 healthcare trajectory can enhance the efficiency and efficacy of healthcare organizations and  
49 ultimately improve patient outcomes while restraining costs. However, existing systematic  
50 reviews have been inconclusive regarding the effectiveness of BPMN in modelling healthcare  
51 trajectory. The aims of this scoping review are to map and aggregate existing evidence on the  
52 main benefits and limitations associated with BPMN in healthcare trajectory and highlight  
53 areas of improvement on using BPMN and its extensions in healthcare practices.

54 **Methods and Analysis:** The proposed scoping review will be performed in accordance with  
55 the methodological framework suggested by Arksey and O'Malley and further refined by  
56 Levac et al. A wide range of electronic databases and grey literature sources will be  
57 systematically searched using predefined keywords. The review will include any study design  
58 with a focus on the application of the BPMN approach applied for optimizing healthcare  
59 trajectories (e.g., diagnostic, and therapeutic processes, decision making, cost, and resources),  
60 published in either English or French from 2004 onwards. Two reviewers will independently  
61 screen titles, abstracts, and full-text articles and select studies meeting the inclusion criteria. A  
62 customised data extraction form will be used to extract data from the included studies. The  
63 results will be presented in tabular format developed iteratively by the research team.

64 **Ethics and dissemination:** Research ethics approval is not required as exclusively secondary  
65 data will be used. Review findings will be used to advance understanding about BPMN, its  
66 extensions, and its application in healthcare trajectory optimization. The review will develop  
67 recommendations about how to tailor BPMN strategies at optimising care pathways and  
68 decision-making processes. Our findings will be disseminated in peer-reviewed journals and  
69 presentations and through discussions with relevant organizations and stakeholders.

70  
71 **Keywords:** Healthcare trajectory, healthcare management, business process modelling  
72 notation, healthcare processes, care pathways, scoping review

**Strengths and limitations of this study**

- ❖ This scoping review will provide a deeper understanding of how BPMN interventions improve organisational practices, clinical practices, and patient outcomes in healthcare organisations.
- ❖ The study will provide a synthesis of the existing evidence about how to implement BPMN consistently and effectively in care processes.
- ❖ Findings from this review will be used to elaborate recommendations about how to tailor BPMN interventions in healthcare trajectory optimisation.
- ❖ The quality appraisal of publications captured will not be assessed, as it is beyond the aim of a scoping review.
- ❖ Both peer-reviewed and grey literature will be considered to ensure a comprehensive coverage, but studies will be limited to those published in French and English.

## 114 INTRODUCTION

115 With the continuous challenges facing healthcare organisations in the past few years<sup>1-3</sup>, many  
116 strategies have focused on process improvements with the objective of enhancing efficiency  
117 and efficacy to improve patient outcomes while controlling costs<sup>4,5</sup>. Through the years, health  
118 expenditure and financing has increased substantially in developed countries such as the United  
119 States (US) and Canada<sup>6-9</sup>. In 2019, Canada spent 10.8% of its gross domestic product on  
120 healthcare expenses according to the Organization for Economic Cooperation and  
121 Development (OECD, 2021)<sup>9</sup>. This ratio reached 17.7% at the same time in the US, where the  
122 national health spending is projected to reach \$6.2 trillion by 2028, growing at an average  
123 annual rate of 5.4%<sup>8,9</sup>. However, compared with other OECD countries, the US perform poorly  
124 on process, outcome, and patient experience metrics, as well as life expectancy<sup>10,11</sup>. Life  
125 expectancy in the US was the lowest at 78.8 years compared with a range from 80.7 to 83.9  
126 years for other OECD countries<sup>10</sup>. The infant mortality rate in the US was 5.8 per 1000 live  
127 births and the maternal mortality rate was 17.4 per 100 000 births in 2018, both higher than the  
128 mean rates for any OECD country<sup>11-15</sup>. Canada is another developed country performing poorly  
129 in terms of infant and maternal mortality, with 4.7 fatalities out of every 1,000 live births and  
130 10.2 maternal deaths per 100 000 births<sup>11,16</sup>.

131 The lack of control in processes used to deliver medical care is clearly a major problem in the  
132 context of preventable medical errors with lethal damages and high economic costs in many  
133 hospitals<sup>17-19</sup>. Since the released *Crossing the Quality Chasm*<sup>20,21</sup> by the Institute of Medicine  
134 (US), numerous national and international organizations including the Academies of  
135 Sciences<sup>22</sup> and the World Health Organization<sup>23,24</sup> have made repeated calls to develop a  
136 framework for advancing the quality of care, ensuring that care is safe, effective, efficient,  
137 patient-centred, timely, and equitable<sup>20</sup>. To do this, healthcare organizations and systems must  
138 develop solutions that enhance both efficiency and efficacy of improving healthcare  
139 organization and patient outcomes while restraining costs. Efforts to improve clinical and care  
140 pathways have shown such benefits<sup>25-27</sup>. Over the last decades, studies have revealed that  
141 mapping healthcare trajectories allowed to decrease the variation of professional practices and  
142 to standardise care processes<sup>17-19</sup>. This practice has many benefits such as improving the  
143 accessibility, fluidity, quality, performance, and sustainability of healthcare services<sup>25,28</sup>.

144 In this context, several tools have been developed to support process improvement through  
145 process mapping. Among these methods, business process modelling notation (BPMN) is an  
146 approach that consists of representing processes as a network of activities and tasks<sup>29-31</sup>. This  
147 structured approach supported by the Object Management Group since 2005 and adopted as an

1  
2  
3 148 international standard by the International Organization for Standardization since 2012, is in  
4  
5 149 its second version (BPMN 2.0)<sup>30-32</sup>.

6 150 In recent years, a few reviews<sup>33-36</sup> have been conducted to analyse whether the BPMN  
7  
8 151 approach can become a useful tool to improve the effectiveness and quality of healthcare  
9  
10 152 processes. For instance, Loya et al.<sup>33</sup> used a service-oriented architecture in clinical decision  
11  
12 153 support and provided evidence that BPMN was not commonly used for clinical decision  
13  
14 154 support systems, despite being the preferred standard for business process modelling in  
15  
16 155 healthcare. Mincarone et al.<sup>34</sup> demonstrated that BPMN provides a good level of formalisation,  
17  
18 156 a standardised communication framework between multiple stakeholders, good user  
19  
20 157 comprehensibility, and easier interprofessional analyses. Fernández et al.<sup>35</sup> suggested that  
21  
22 158 BPMN is useful for standardising processes that have some variability due to its possibility to  
23  
24 159 incorporate variations or changes. Moreover, Zarour et al.<sup>36</sup> analysed various BPMN  
25  
26 160 extensions (e.g., decision modelling notation) that can be used to improve its efficiency in many  
27  
28 161 domains, showing that healthcare was among the most targeted area. The overall conclusion of  
29  
30 162 these reviews<sup>33-36</sup> is that BPMN seems to be increasingly used in healthcare organizations to  
31  
32 163 the point of becoming a standard in process improvement methods. However, these studies<sup>33-  
33  
34 164 36</sup> acknowledged the difficulties and challenges when implementing BPMN in the health sector.  
35  
36 165 Indeed, a limitation of these studies<sup>33-36</sup> is that none of them put the use of BPMN to improve  
37  
38 166 healthcare trajectories or patient care trajectory as its primary focus. Loya et al.<sup>33</sup> focused on  
39  
40 167 the use of BPMN for supporting clinical decisions and stated that BPMN has potential to  
41  
42 168 optimise clinical pathways, but they did not assess this possibility. The papers of Mincarone et  
43  
44 169 al.<sup>34</sup> and Fernández et al.<sup>35</sup> mainly focused on clinical processes, briefly addressing healthcare  
45  
46 170 trajectories, resulting in a shallow analysis on this subject. Finally, Zarour et al.<sup>36</sup> targeted many  
47  
48 171 BPMN extensions that could improve its effectiveness, but their research was not exclusive to  
49  
50 172 healthcare setting.

51  
52 173 Our literature review builds on these previous reviews<sup>33-36</sup> by providing an in-depth analysis  
53  
54 174 of the ability of BPMN to effectively improve the quality of clinical practices, the security, and  
55  
56 175 the fluidity of the care process and to propose tangible results on the patient experience in a  
57  
58 176 patient-centred care and services logic. Moreover, we will analyse the opportunities and  
59  
60 177 limitations related to the integration of BPMN extension.

61  
62 178 Considering the above gaps in the literature, the primary aim of this scoping review is to  
63  
64 179 identify and map existing evidence on the main benefits and limitations associated with the use  
65  
66 180 of BPMN in healthcare trajectory modelling. To do so, we will assess its ability to model key  
67  
68 181 dimensions or concepts of the healthcare process and to meet the needs of stakeholders. The

1  
2  
3 182 review will also highlight the capacity of the BPMN approach and its extensions to support  
4  
5 183 clinical activities and decision-making processes associated with the healthcare trajectory and  
6  
7 184 propose a conceptual framework for improving the use of BPMN in healthcare practices.

## 8 185 **METHODS AND ANALYSIS**

9  
10 186 We chose to undertake a scoping review as the best method to map the available evidence  
11  
12 187 regarding the benefits and limitations of BPMN in modelling patient healthcare trajectory<sup>37-39</sup>.  
13  
14 188 The present review will be conducted following the methodological frameworks described by  
15  
16 189 Arksey and O'Malley<sup>37</sup>, and improved by Levac et al.<sup>38</sup>, and further refined by the Joanna  
17  
18 190 Briggs Institute (JBI)<sup>40</sup>. The standardized methodology included six stages for scoping review:  
19  
20 191 (1) Identifying the research question, (2) Identifying relevant studies and grey literature, (3)  
21  
22 192 Selecting studies, (4) Charting the data, (5) Collating, summarizing, and reporting the data, and  
23  
24 193 (6) Consulting with relevant stakeholders, thereby enabling knowledge translation. The  
25  
26 194 Preferred Reporting Items for Systematic Reviews and Meta-Analysis Extension for Scoping  
27  
28 195 Reviews (PRISMA-ScR)<sup>39,41</sup> has also been used to guide the reporting of this protocol and will  
29  
30 196 also subsequently be used to structure the reporting of the full review. Furthermore, we will  
31  
32 197 take an iterative and reflexive approach throughout the review process, particularly to refine  
33  
34 198 our study selection and data extraction steps to the best target meeting our objective. This  
35  
36 199 protocol is registered through the Open Science Framework<sup>42</sup>.

### 34 200 **Stage 1: Identifying the Research Question**

36 201 As the focus of scoping reviews is on summarizing the breadth of evidence, the research  
37  
38 202 questions should be broad while keeping in mind the review's main purpose<sup>37,38,40,41</sup>. Thus, we  
39  
40 203 started with, "What is known about the application of BPMN methodology in healthcare  
41  
42 204 organization?" A preliminary search was conducted through some electronic databases  
43  
44 205 including International Prospective Register of Systematic Reviews, JBI Database of  
45  
46 206 Systematic Reviews and Implementation Reports, Cochrane Database of Systematic Reviews,  
47  
48 207 and National Center for Biotechnology Information, which revealed three systematic reviews  
49  
50 208 of modelling healthcare processes using the BPMN methodology<sup>33-36</sup>. Although findings from  
51  
52 209 these reviews<sup>33-36</sup> supported the use of BPMN as an effective methodology to optimise  
53  
54 210 healthcare processes, no conclusion on the effectiveness were drawn. The reason may be that  
55  
56 211 these reviews<sup>33-36</sup> were not mainly focused on the use of BPMN to improve healthcare  
57  
58 212 trajectories.

56 213 In addition, we adopted the JBI's Population Concept and Context (PCC) framework<sup>40</sup> to  
57  
58 214 formulate the objectives and research questions, and to conceptualise the study and report  
59  
60



1  
2  
3 215 characteristics in terms of eligibility criteria (**Table 1**). We then consulted with experienced  
4  
5 216 colleagues<sup>30</sup> on our predefined set of questions to provide further input and feedback.

6  
7 217 In line with our purpose to comprehensively map the extent, range and nature of evidence  
8  
9 218 examining the use or application of BPMN within the healthcare trajectory, we formulated four  
10  
11 219 specific research questions to guide this review.

- 12 220 1. What are the objectives for using BPMN in healthcare organization? What are the  
13  
14 221 expected results and what are the needs to be met?
- 15 222 2. What are the key variables, elements, concepts, and dimensions targeted by the BPMN  
16  
17 223 approach?
- 18  
19 224 3. Can the BPMN approach meet these expectations in healthcare trajectory? Specifically,  
20  
21 225 a. What are the strengths (advantages) and weaknesses (limitations) of the BPMN in  
22  
23 226 modelling healthcare trajectory?  
24  
25 227 b. What are the effectiveness of using BPMN approach and its extensions in modelling  
26  
27 228 healthcare trajectory?  
28  
29 229 c. What are their opportunities and constraints in modelling healthcare processes?
- 30  
31 230 4. What are the improvements or alternatives proposed to optimizing healthcare trajectory?

32  
33 231 For the purposes of this review, the term healthcare trajectory focuses on the patient's care  
34  
35 232 pathway across the continuum of care. Thus, it can be the clinical pathway when it focuses on  
36  
37 233 the organizational scale, but also the care pathway when it focuses on the systemic scale. It  
38  
39 234 consists first of the patient's journey through the sequencing of tasks and activities at all points  
40  
41 235 of contact<sup>43,44</sup>. It then integrates the professional actors involved in the care trajectory,<sup>45,46</sup> the  
42  
43 236 operation management of care delivery processes<sup>47,48</sup>, the coordination structures<sup>49-51</sup>, the  
44  
45 237 structural context of the system and organizations<sup>52,53</sup> as well as the information trajectory  
46  
47 238 along the healthcare trajectory<sup>54,55</sup>. Thus, our understanding of the term healthcare trajectory is  
48  
49 239 not limited to the operational aspect of the care process and to the pathophysiological process  
50  
51 240 of a patient's disease state, but also refers to the organisation of all activities surrounding  
52  
53 241 interactions between health care workers and patients, as well as the effectiveness of patient  
54  
55 242 care processes and their effectiveness.

56  
57 243 Therefore, our analysis will consider not only the operational outcomes of the application  
58  
59 244 BPMN, but also its societal impact by assessing its potential to improve patient outcomes and  
60  
245 experience. In addition, healthcare process mapping includes several different flows. On one  
246  
247 hand, the main process follows the patient's journey through the process steps and the decision  
248  
249 points guide the patient through the process<sup>56</sup>. On the other hand, the support processes and  
250  
251 secondary flows include steps directly or indirectly linked to the main process such as

1  
2  
3 249 administrative processes, information flow, organizational processes, and examinations that do  
4  
5 250 not require the presence of the patient (e.g., laboratory results, pathological tests). Thus, several  
6  
7 251 flows can be present and impact the care process (e.g., information flow, drug flow, blood  
8  
9 252 flow,).

10 253 Therefore, this scoping review will focus on the potential of the BPMN and all its components  
11  
12 254 to impact the results of healthcare trajectories directly or indirectly. Finally, the review will  
13  
14 255 also consider proposals for extensions to BPMN have been put forward to integrate evidence-  
15  
16 256 based medicine and guidelines to support clinical decision making, including the Decision  
17  
18 257 Modelling Notation proposed by both the Object Management Group<sup>56,57</sup> and the Computer  
19  
20 258 Interpretable Guidelines<sup>58,59</sup>.

21 259  
22 260  
23  
24  
25  
26  
27  
28  
29  
30  
31  
32  
33  
34  
35  
36  
37  
38  
39  
40  
41  
42  
43  
44  
45  
46  
47  
48  
49  
50  
51  
52  
53  
54  
55  
56  
57  
58  
59  
60

261 **Table 1:** PCC framework<sup>40</sup> for illustrating the scope and defining inclusion and exclusion criteria of the review

|                   | Inclusion                                                                                                                                                                                                                                                                                                                                                                                                                                                                                                                                                                           | Exclusion                                                                                                                                                                                                                                                                                                                                                                                                                                       |
|-------------------|-------------------------------------------------------------------------------------------------------------------------------------------------------------------------------------------------------------------------------------------------------------------------------------------------------------------------------------------------------------------------------------------------------------------------------------------------------------------------------------------------------------------------------------------------------------------------------------|-------------------------------------------------------------------------------------------------------------------------------------------------------------------------------------------------------------------------------------------------------------------------------------------------------------------------------------------------------------------------------------------------------------------------------------------------|
| Population        | Participants of interest are the healthcare stakeholders (knowledge users) involved directly or indirectly with the use of BPMN during the healthcare trajectory or clinical process. The healthcare stakeholders (knowledge users) will include patients, healthcare professionals (e.g., nurses, physicians, other professionals), administrators and decision-makers who were involved at least once in the healthcare trajectory or clinical processes (clinical or care pathways).                                                                                             | Literature that does not apply BPMN in health trajectory (e.g., healthcare process, clinical process, process of care, patient care process, healthcare trajectory, clinical pathways, patient care management). Since we are interested in the efficacy and limitations of BPMN in healthcare trajectory, this needs to be evidence-based (analyse a case clinical pathway) and not speculative.                                               |
| Concept           | The concept is the application of BPMN in healthcare trajectory and/or clinical processes to evaluate the capacity of BPMN to optimise healthcare performance. Studies that reported any healthcare intervention and/or clinical processes modelling with BPMN, including the improvement of the quality assessment and decision-making processes, the capacity to understand the internal clinical procedures, the ability to communicate those procedures in a standard manner, the ability to adjust to new internal challenges quickly and patients' outcomes will be included. |                                                                                                                                                                                                                                                                                                                                                                                                                                                 |
| Context           | The context for this review will consider studies conducted in any clinical setting (e.g., inpatient, outpatient) or healthcare settings (e.g., hospitals, health centres, nursing homes). Studies conducted in any part of the world are eligible to be included in this review                                                                                                                                                                                                                                                                                                    | Literature related to BPMN occurring outside of healthcare trajectory (e.g., clinical process, process of care, patient care process, patient trajectory, clinical pathways, patient care management)                                                                                                                                                                                                                                           |
| Types of evidence | Reviews (e.g., systematic, or narrative reviews), peer-reviewed research articles, full-text articles are specific to modelling patient care trajectory incorporate the use of BPMN as a methodological approach and published in either English or French.                                                                                                                                                                                                                                                                                                                         | Studies published before 2004, not written in either English or French. Editorial articles, abstracts or posters, protocols for planned studies, strategy, or guidelines. Articles where full text is unavailable. Study do not indicate the use of BPMN as a methodological approach. Study focuses on other healthcare elements, such as professional development and performance management but not specifically on patient care trajectory. |

262

## 263 **Stage 2: Identifying Relevant Studies**

264 A comprehensive search strategy was developed with the assistance of an experienced health  
265 sciences librarian (FB). The search strategy will follow the three-step approach recommended  
266 by JBI scoping review guidelines<sup>40</sup> and will target the retrieval of both published and  
267 unpublished articles from electronic searches databases, focusing to BPMN modelling of  
268 patient care trajectory. The first step of the scoping review guidelines has been completed in  
269 preparation of this protocol (**Table 1**), which involved an initial limited search on PubMed and  
270 ABI/Inform (ProQuest) databases, using the following selected keywords: "Healthcare  
271 Process" OR "Clinical Process " OR "Process of Care" OR "Clinical Pathways" OR "Patient  
272 care Process" OR "Healthcare trajectory" OR Patient Care Management" OR "Critical  
273 Pathways" OR "Clinical Healthcare Pathways" AND "Business Process Model" OR "Business  
274 Process Modelling Notation" OR "Business Process Model" OR "BPMN modelling" OR  
275 "Workflow" OR "Clinical Decision-Making" OR "Decision Support Systems" OR "Medical  
276 Process". The index words and the text words in the title and abstract of retrieved articles were  
277 analysed to identify search terms and refine the search strategy for the next step.

278 In the second step, the search strategy will be adapted and implemented for each included  
279 information source (PubMed, Embase (Embase.com), CINAHL(EBSCO), Web of Science,  
280 ABI/Inform (ProQuest), Academic Search Premier (EBSCO), and Google Scholar) for  
281 potential eligible studies published in either English or French language, from 2004, year when  
282 BPMN was initially developed by the Business Process Management Institute. In addition to  
283 the electronic database search, we will undertake a hand search of some relevant journals (e.g.,  
284 Institute of Electrical and Electronics Engineers, Health Informatics Journal), search citations  
285 of relevant papers and scan the reference lists of relevant papers. The final search results will  
286 be exported to the Covidence systematic review software<sup>60,61</sup> where duplicates will be removed.  
287 The full detailed search strategy for peer review and grey literature sources is included in **online**  
288 **Supplementary Appendix I.**

## 289 **Stage 3: Selecting Literature for Inclusion**

290 All retrieved articles will undertake two levels of screening. First, two reviewers (KSA and  
291 JBG or LL) will independently screen titles and abstracts of each article against the established  
292 inclusion and exclusion criteria (**Table 1**). To increase the reliability of screening by the two  
293 reviewers (KSA and JBG or LL), a pilot test will be conducted on 50 titles and abstracts to  
294 evaluate reviewer agreement in the screening process. Discrepancies will be resolved through  
295 discussion between the two reviewers and where agreement could not be reached, a third  
296 reviewer (PL, CP, CL, or AC) will be consulted. Adjustments may also be made to the inclusion

1  
2  
3 297 criteria if necessary to ensure consistent interpretation and application of the criteria. The  
4  
5 298 researchers will discuss their selection of articles after this first round of screening, to arrive at  
6  
7 299 preliminary consensus on the list of eligible studies. In the second step, the two reviewers will  
8  
9 300 screen the full-text articles independently to determine if they meet the inclusion criteria.  
10  
11 301 Reasons for the exclusion of full-text articles will be noted in Covidence<sup>61</sup> by each reviewer.  
12  
13 302 Reviewers will again discuss their selection of articles after this second round of screening, to  
14  
15 303 arrive at a final list of eligible studies. Discrepancies will again be resolved through discussion  
16  
17 304 between the two reviewers and where agreement could not be reached, a third reviewer will be  
18  
19 305 consulted. The screening process will be documented using a PRISMA flowchart for scoping  
20  
21 306 review<sup>39,41</sup> and by calculating the inter-rater reliability between reviewers using the Cohen's  
22  
23 307 Kappa coefficient<sup>62</sup>.

#### 24 308 **Stage 4: Charting of Information and Data**

25 309 Data will be extracted from every eligible article using a data extraction chart (**Charting**  
26 310 **Table**) tailored to the research questions. Its aim is to maintain a manageable amount of data,  
27 311 while ensuring a wide approach and breadth of coverage to obtain existing evidence on the  
28 312 benefits and limitations associated with BPMN in patient care trajectory. Two researchers  
29 313 (KSA and JBG or LL) will independently extract the following study information: authorship,  
30 314 year of publication, country of origin, study purpose, patient care trajectory issues being  
31 315 addressed (e.g., diabetes, chronic obstructive pulmonary disease, coronary heart disease,  
32 316 clinical pathways for contraception), study population/target users (e.g., physicians, clinicians,  
33 317 nurses, pharmacists), setting/location of intervention (e.g., primary care, acute care,  
34 318 rehabilitation, home care, long-term care, community, hospital), methodological approach  
35 319 (qualitative, quantitative, or mixed study), expected results study findings (e.g., decreasing  
36 320 diagnostic delay, optimizing of quality care, cost, reducing medical errors, standardising the  
37 321 decision-making process), type of outcomes/dimension analysed (e.g., diagnostic times,  
38 322 waiting time for surgery, flexibility, improving key performance indicators, decision support  
39 323 systems). We will note the objectives and benefits, as well the limitations of using BPMN and  
40 324 BPMN-extension approach. The proposed Charting Table is shown in **online Supplementary**  
41 325 **Appendix II**. It will be trialled on five included studies and will be iteratively refined.  
42 326 Adjustments or expansions may also be made to the **Charting Table** if necessary to ensure  
43 327 that the research objectives or questions are well addressed. For instance, we may add  
44 328 additional categories of data deemed relevant to answer the research questions to the Charting  
45 329 Table.

#### 50 330 **Stage 5: Collating, Summarizing, and Reporting the Data**

1  
2  
3 331 The main findings of the included studies will be summarised in Tabular format in a manner  
4  
5 332 that reflects the objectives of the review. Following the PCC principles<sup>40</sup>, a narrative summary  
6  
7 333 will accompany the Tabular results and link the different findings to the review objective and  
8  
9 334 questions and will identify any knowledge gaps in the literature. To ensure rigour in this stage,  
10  
11 335 two reviewers (KSA and JBG or LL) will prepare a descriptive summary table of the extracted  
12  
13 336 data and will highlight the key findings with input from the research team. The table will  
14  
15 337 include a descriptive summary of the studies and a qualitative thematic analysis of the main  
16  
17 338 results regarding characteristics of the BPMN approach used in each study (e.g., objective,  
18  
19 339 benefit, challenges, target users, redesign the clinical process), type of patient trajectory,  
20  
21 340 characteristics of the research designs, outcomes of interest used to measure the effectiveness  
22  
23 341 of BPMN (e.g., reducing work time, and challenges and potential solutions learned). We will  
24  
25 342 identify barriers or limitations of BPMN for achieving improvement of healthcare processes,  
26  
27 343 support activities and decision-making processes, and use that information to address our main  
28  
29 344 objectives. The consultation stage of the scoping review, described in the following section,  
30  
31 345 will contribute to fulfilling that objective and to establish a conceptual framework for  
32  
33 346 improving the use of BPMN in healthcare trajectory modelling. Finally, if the extracted data  
34  
35 347 allow it, a qualitative analysis will be conducted to discuss or nuance the evidence of BPMN  
36  
37 348 effectiveness considering potential barriers and enablers identified by the authors. We will use  
38  
39 349 the PRISMA-ScR to guide the final reporting of our results.

### 350 **Stage 6: Consultation with Stakeholders**

351 The final consultation stage offers an ideal mechanism to enhance the validity of the study  
352 outcome while translating findings with the stakeholders or health professionals. Preliminary  
353 findings from this review will provide the background for workshop with the research team  
354 and stakeholders/knowledge users (e.g., healthcare professionals, patients, decision-makers,  
355 administrators). The objectives of the workshop are to present and discuss the interim results  
356 of the synthesis. The meeting will generate a list of key practice recommendations,  
357 dissemination strategy and research priority areas to inform future research. The workshop will  
358 be conducted with the research team with a focus on reviewing the results following feedback  
359 from the previous meeting, reviewing the final report, necessary modifications to findings and  
360 recommendations for precision and clarity. These consultations with all stakeholders, including  
361 clinicians, technicians, and patients, aim to materialise the findings of this review by discussing  
362 their applications in specific contexts.

### 363 **ETHICS AND DISSEMINATION**



1  
2  
3 364 This scoping review is exempt from ethics approval because the work carried out will be based  
4  
5 365 on published documents. The aim of this project is to synthesise the literature about healthcare  
6  
7 366 trajectory using BPMN approach to enhance conceptual clarity and understanding about key  
8  
9 367 benefits and limitations and to extrapolate from this evidence base promising conceptual  
10  
11 368 framework for improving the use of BPMN in healthcare trajectory. We anticipate the research  
12  
13 369 will provide several key outputs including (1) a comprehensive review that will summarize  
14  
15 370 existing literature on the BPMN approach; (2) an evidence base demonstrating the benefits and  
16  
17 371 limitation of the BPMN approach in modelling patient trajectory; (3) a list of BPMN extensions  
18  
19 372 that can be used to improve its efficiency in many domains; (4) a conceptual framework. Our  
20  
21 373 findings will be disseminated in peer-reviewed journals and presentations and through  
22  
23 374 discussions with relevant organisations and stakeholders. Our goal will be to disseminate our  
24  
25 375 findings to a wide range of clinicians, leaders, and administrators in all sectors, to researchers  
26  
27 376 and to students entering the healthcare professions to enhance understanding about key benefits  
28  
29 377 and limitations of BPMN approach for optimising the patient trajectory. We believe the results  
30  
31 378 will benefit clinicians by guiding their decision-making throughout the patient's trajectory,  
32  
33 379 therefore reducing the medical error rate, optimising efficient resource management, and  
34  
35 380 reducing the risks of complications due to poor clinical decisions. Those improvements should  
36  
37 381 result in an optimisation of cost-efficiency for organisations and quality of care for patients.

382

36 383 **Contributors:** KSA, JBG and AC led the design, search strategy and conceptualisation of this  
37  
38 384 work and drafted the protocol. PL, FB, and CP were involved in the conceptualisation of the  
39  
40 385 review design, inclusion and exclusion criteria and provided feedback on the methodology and  
41  
42 386 the manuscript. KSA and LL were involved in data extraction forms. All authors provided  
43  
44 387 feedback on the manuscript and approval to the publishing of this protocol manuscript.

44 388 **Funding** None.

46 389 **Competing interests:** The authors declare no potential conflict of interest

48 390 **Patient consent:** Not required.

50 391 **Ethics approval: Research** ethics approval is not required for a scoping review.

51 392 **Provenance and peer review:** Not commissioned; externally peer reviewed.

53 393

54 394

55 395

57 396 **Reference**

- 1  
2  
3 397 1. McMahon M, Nadigel J, Thompson E, Glazier RH. Informing Canada's health system  
4 398 response to COVID-19: priorities for health services and policy research. *Healthcare*  
5 399 *Policy*. 2020;16(1):112.
- 6 400 2. Smylie J, Anderson M. Understanding the health of Indigenous peoples in Canada:  
7 401 key methodological and conceptual challenges. *Cmaj*. 2006;175(6):602-602.
- 8 402 3. Smylie J, Firestone M. Back to the basics: Identifying and addressing underlying  
9 403 challenges in achieving high quality and relevant health statistics for indigenous  
10 404 populations in Canada. *Statistical Journal of the IAOS*. 2015;31(1):67-87.
- 11 405 4. Cortada J, Gordon D, Lenihan B. The value of analytics in healthcare: From insights  
12 406 to outcomes. *IBM Global Business Services, Executive Report*. 2012.
- 13 407 5. Contandriopoulos D, Brousselle A, Larouche C, et al. Healthcare reforms, inertia  
14 408 polarization and group influence. *Health Policy*. 2018;122(9):1018-1027.
- 15 409 6. Himmelstein DU, Campbell T, Woolhandler S. Health care administrative costs in the  
16 410 United States and Canada, 2017. *Annals of internal medicine*. 2020;172(2):134-142.
- 17 411 7. Liu C, Tsugawa Y, Weiser TG, Scott JW, Spain DA, Maggard-Gibbons M.  
18 412 Association of the US Affordable Care Act with out-of-pocket spending and  
19 413 catastrophic health expenditures among adult patients with traumatic injury. *JAMA*  
20 414 *network open*. 2020;3(2):e200157-e200157.
- 21 415 8. Keehan SP, Cuckler GA, Poisal JA, et al. National Health Expenditure Projections,  
22 416 2019–28: Expected Rebound In Prices Drives Rising Spending Growth: National  
23 417 health expenditure projections for the period 2019–2028. *Health Affairs*.  
24 418 2020;39(4):704-714.
- 25 419 9. OCDE. *Health at a Glance 2021*. 2021.
- 26 420 10. Papanicolas I, Woskie LR, Jha AK. Health Care Spending in the United States and  
27 421 Other High-Income Countries. *JAMA*. 2018;319(10):1024-1039.
- 28 422 11. Emanuel EJ, Gudbranson E, Van Parys J, Gørtz M, Helgeland J, Skinner J.  
29 423 Comparing health outcomes of privileged US citizens with those of average residents  
30 424 of other developed countries. *JAMA internal medicine*. 2021;181(3):339-344.
- 31 425 12. Singh GK, Stella MY. Infant mortality in the United States, 1915-2017: large social  
32 426 inequalities have persisted for over a century. *International Journal of Maternal and*  
33 427 *Child Health and AIDS*. 2019;8(1):19.
- 34 428 13. Declercq E, Zephyrin L. Maternal mortality in the United States: a primer.  
35 429 *Commonwealth Fund*. 2020.
- 36 430 14. Hoyert DL. Maternal mortality rates in the United States, 2019. 2020.
- 37 431 15. Singh GK. Trends and social inequalities in maternal mortality in the United States,  
38 432 1969-2018. *International Journal of Maternal and Child Health and AIDS*.  
39 433 2021;10(1):29.
- 40 434 16. Cook JL, Majd M, Blake J, et al. Measuring Maternal Mortality and Morbidity in  
41 435 Canada. *J Obstet Gynaecol Can*. 2017;39(11):1028-1037.
- 42 436 17. Gauld R, Burgers J, Dobrow M, et al. Healthcare system performance improvement: a  
43 437 comparison of key policies in seven high-income countries. *Journal of health*  
44 438 *organization and management*. 2014.
- 45 439 18. Lee SE, Scott LD, Dahinten VS, Vincent C, Lopez KD, Park CG. Safety culture,  
46 440 patient safety, and quality of care outcomes: a literature review. *Western journal of*  
47 441 *nursing research*. 2019;41(2):279-304.
- 48 442 19. Kruk ME, Gage AD, Arsenault C, et al. High-quality health systems in the  
49 443 Sustainable Development Goals era: time for a revolution. *The Lancet global health*.  
50 444 2018;6(11):e1196-e1252.
- 51 445 20. Baker A. *Crossing the quality chasm: a new health system for the 21st century*. Vol  
52 446 323: British Medical Journal Publishing Group; 2001.



- 1  
2  
3 447 21. Wolfe A. Institute of Medicine report: crossing the quality chasm: a new health care  
4 448 system for the 21st century. *Policy, Politics, & Nursing Practice*. 2001;2(3):233-235.  
5 449 22. National Academies of Sciences E, Medicine. Crossing the global quality chasm:  
6 450 Improving health care worldwide. 2018.  
7 451 23. Organization WH. Framework on integrated, people-centred health services. *Geneva:*  
8 452 *World Health Organization*. 2016:2019.  
9 453 24. Organization WH. WHO report on cancer: setting priorities, investing wisely and  
10 454 providing care for all. 2020.  
11 455 25. Bergin RJ, Whitfield K, White V, et al. Optimal care pathways: A national policy to  
12 456 improve quality of cancer care and address inequalities in cancer outcomes. *Journal*  
13 457 *of cancer policy*. 2020;25:100245.  
14 458 26. Allen D, Gillen E, Rixson L. Systematic review of the effectiveness of integrated care  
15 459 pathways: what works, for whom, in which circumstances? *International Journal of*  
16 460 *Evidence-Based Healthcare*. 2009;7(2):61-74.  
17 461 27. Lodewijckx C, Sermeus W, Panella M, et al. Impact of care pathways for in-hospital  
18 462 management of COPD exacerbation: a systematic review. *International journal of*  
19 463 *nursing studies*. 2011;48(11):1445-1456.  
20 464 28. Alkandari M, Ryan K, Hollywood A. The experiences of people living with  
21 465 peripheral neuropathy in Kuwait—a process map of the patient journey. *Pharmacy*.  
22 466 2019;7(3):127.  
23 467 29. Ferreira AS, Oliveira GR. Business process modeling: A webibliomining perspective  
24 468 of architecture frameworks. *Independent Journal of Management & Production*.  
25 469 2019;10(3):1159-1183.  
26 470 30. Ramudhin A, Bulgak AA, Fowler JG. A business process improvement study in a  
27 471 specialized North American hospital. Paper presented at: PICMET 2010  
28 472 TECHNOLOGY MANAGEMENT FOR GLOBAL ECONOMIC GROWTH2010.  
29 473 31. Ramudhin A, Chan E, Mokadem A. A framework for the modelling, analysis and  
30 474 optimization of pathways in healthcare. Paper presented at: 2006 International  
31 475 Conference on Service Systems and Service Management2006.  
32 476 32. Ramudhin A, Chan E, Benziane R, Mokadem A. Modeling and optimization of health  
33 477 care processes. Paper presented at: IIE Annual Conference. Proceedings2006.  
34 478 33. Loya SR, Kawamoto K, Chatwin C, Huser V. Service oriented architecture for  
35 479 clinical decision support: A systematic review and future directions. *Journal of*  
36 480 *medical systems*. 2014;38(12):1-22.  
37 481 34. Mincarone P, Leo CG, Trujillo-Martín MdM, et al. Standardized languages and  
38 482 notations for graphical modelling of patient care processes: a systematic review.  
39 483 *International Journal for Quality in Health Care*. 2018;30(3):169-177.  
40 484 35. De Ramon Fernandez A, Ruiz Fernandez D, Sabuco Garcia Y. Business Process  
41 485 Management for optimizing clinical processes: A systematic literature review. *Health*  
42 486 *informatics journal*. 2020;26(2):1305-1320.  
43 487 36. Zarour K, Benmerzoug D, Guermouche N, Drira K. A systematic literature review on  
44 488 BPMN extensions. *Business Process Management Journal*. 2019.  
45 489 37. Arksey H, O'Malley L. Scoping studies: towards a methodological framework.  
46 490 *International journal of social research methodology*. 2005;8(1):19-32.  
47 491 38. Levac D, Colquhoun H, O'Brien KK. Scoping studies: advancing the methodology.  
48 492 *Implementation science*. 2010;5(1):1-9.  
49 493 39. Tricco AC, Lillie E, Zarin W, et al. A scoping review on the conduct and reporting of  
50 494 scoping reviews. *BMC medical research methodology*. 2016;16(1):1-10.  
51 495 40. Peters MD, Godfrey C, McInerney P, Munn Z, Tricco AC, Khalil H. Chapter 11:  
52 496 scoping reviews (2020 version). *JBIM manual for evidence synthesis, JBI*. 2020;2020.

- 1  
2  
3 497 41. Tricco AC, Lillie E, Zarin W, et al. PRISMA extension for scoping reviews  
4 498 (PRISMA-ScR): checklist and explanation. *Annals of internal medicine*.  
5 499 2018;169(7):467-473.  
6  
7 500 42. Abasse KS, Gartner J-B, Labbé L, et al. Benefits and Limitations of Business Process  
8 501 Model Notation in Modeling Patient Healthcare Trajectory: A Scoping Review  
9 502 Protocol. 2021.  
10 503 43. Ponsignon F, Smart A, Phillips L. A customer journey perspective on service delivery  
11 504 system design: insights from healthcare. *International Journal of Quality &*  
12 505 *Reliability Management*. 2018.  
13 506 44. Alexander GL. The nurse—patient trajectory framework. *Studies in health technology*  
14 507 *and informatics*. 2007;129(Pt 2):910.  
15 508 45. Beauséjour M, Goulet L, Feldman DE, et al. Pathways of healthcare utilisation in  
16 509 patients with suspected adolescent idiopathic scoliosis: a cross-sectional study. *BMC*  
17 510 *health services research*. 2015;15(1):1-12.  
18 511 46. Louis CJ, Clark JR, Gray B, Brannon D, Parker V. Service line structure and  
19 512 decision-maker attention in three health systems: Implications for patient-centered  
20 513 care. *Health care management review*. 2019;44(1):41-56.  
21 514 47. Yang H, Li W, Liu K, Zhang J. Knowledge-based clinical pathway for medical  
22 515 quality improvement. *Information systems frontiers*. 2012;14(1):105-117.  
23 516 48. De Bleser L, Depreitere R, WAELE KD, Vanhaecht K, Vlayen J, Sermeus W.  
24 517 Defining pathways. *Journal of nursing management*. 2006;14(7):553-563.  
25 518 49. Aziz AFA, Nordin NAM, Ali MF, Abd Aziz NA, Sulong S, Aljunid SM. The  
26 519 integrated care pathway for post stroke patients (iCaPPS): a shared care approach  
27 520 between stakeholders in areas with limited access to specialist stroke care services.  
28 521 *BMC health services research*. 2017;17(1):1-11.  
29 522 50. Busari JO, Yaldiz H, Gans RO, Duits AJ. Clinical Leadership as an Agent for  
30 523 Change: A Health System Improvement Intervention in Curaçao. *Journal of*  
31 524 *multidisciplinary healthcare*. 2020;13:787.  
32 525 51. Seguin ML, Rangnekar A, Renedo A, Palafox B, McKee M, Balabanova D.  
33 526 Systematic review of frameworks used to conceptualise health pathways of  
34 527 individuals diagnosed with cardiovascular diseases. *BMJ global health*.  
35 528 2020;5(9):e002464.  
36 529 52. Valentijn PP, Biermann C, Bruijnzeels MA. Value-based integrated (renal) care:  
37 530 setting a development agenda for research and implementation strategies. *BMC health*  
38 531 *services research*. 2016;16(1):1-11.  
39 532 53. Elkhuzen SG, Vissers JM, Mahdavi M, Van De Klundert JJ. Modeling Patient  
40 533 Journeys for Demand Segments in Chronic Care, With an Illustration to Type 2  
41 534 Diabetes. *Frontiers in Public Health*. 2020;8.  
42 535 54. Fung-Kee-Fung M, Maziak D, Pantarotto J, et al. Regional process redesign of lung  
43 536 cancer care: a learning health system pilot project. *Current Oncology*. 2018;25(1):59-  
44 537 66.  
45 538 55. Mohr P, Galderisi S, Boyer P, et al. Value of schizophrenia treatment I: The patient  
46 539 journey. *European Psychiatry*. 2018;53:107-115.  
47 540 56. Combi C, Oliboni B, Zardiniy A, Zerbato F. Seamless design of decision-intensive  
48 541 care pathways. Paper presented at: 2016 IEEE International Conference on Healthcare  
49 542 Informatics (ICHI)2016.  
50 543 57. Cánovas-Segura B, Zerbato F, Oliboni B, et al. A process-oriented approach for  
51 544 supporting clinical decisions for infection management. Paper presented at: 2017  
52 545 IEEE International Conference on Healthcare Informatics (ICHI)2017.  
53  
54  
55  
56  
57  
58  
59  
60

- 1  
2  
3 546 58. Hewelt M, Kunde A, Weske M, Meinel C. Recommendations for medical treatment  
4 547 processes: the PIGS approach. Paper presented at: International Conference on  
5 548 Business Process Management2014.  
6 549 59. de Bruin JS, Adlassnig K-P, Leitich H, Rappelsberger A. Separating business logic  
7 550 from medical knowledge in digital clinical workflows using business process model  
8 551 and notation and arden syntax. In: *Health Informatics Meets eHealth*. IOS Press;  
9 552 2018:17-24.  
10 553 60. Babineau J. Product review: covidence (systematic review software). *Journal of the*  
11 554 *Canadian Health Libraries Association/Journal de l'Association des bibliothèques de*  
12 555 *la santé du Canada*. 2014;35(2):68-71.  
13 556 61. Kellermeyer L, Harnke B, Knight S. Covidence and Rayyan. *Journal of the Medical*  
14 557 *Library Association: JMLA*. 2018;106(4):580.  
15 558 62. McHugh ML. Interrater reliability: the kappa statistic. *Biochemia medica*.  
16 559 2012;22(3):276-282.  
17 560

## Supplementary materials – Databases search strategy

### Medline (Ovid)

Date of the search: 09-12-2021

Database limit: No database limit has been apply

| # | Search strategy                                                                                                                                                                                                                                                                                      | Results |
|---|------------------------------------------------------------------------------------------------------------------------------------------------------------------------------------------------------------------------------------------------------------------------------------------------------|---------|
| 1 | ("Business Process*" adj1 (Model* OR Method? OR management)).ti,ab,kw,kf OR "Decision Model* notation".ti,ab,kw,kf OR BPMN*.ti,ab,kw,kf OR BPM.ti,kw,kf                                                                                                                                              | 285     |
| 2 | Critical Pathways/ OR Practice Guidelines as Topic/ OR Workflow/ OR Clinical Decision-Making/ OR Decision Support Systems, Clinical/ OR Patient Care Management/                                                                                                                                     | 163743  |
| 3 | (Decision adj1 (making OR support)).ti,ab,kw OR ((clinical OR medical OR healthcare OR "health care") adj2 process*).ti,ab,kw OR ((healthcare OR clinical OR critical OR care) adj2 path*).ti,ab,kw OR guideline*.ti,ab,kw OR Workflow*.ti,ab,kw OR careflow*.ti,ab,kw OR "patient journey".ti,ab,kw | 686144  |
| 4 | 2 or 3                                                                                                                                                                                                                                                                                               | 769504  |
| 5 | 1 and 4                                                                                                                                                                                                                                                                                              | 99      |
| 6 | limit 5 to ed=20040101-20211209                                                                                                                                                                                                                                                                      | 85      |

### Embase (Embase.com)

Date of the search: 09-12-2021

Database limit: No database limit has been apply

| # | Search strategy                                                                                                                                                                                                                                                                                                                                                  | Results   |
|---|------------------------------------------------------------------------------------------------------------------------------------------------------------------------------------------------------------------------------------------------------------------------------------------------------------------------------------------------------------------|-----------|
| 1 | ("Business Process*" NEAR/1 (Model* OR Method\$ OR management)).ti,ab,kw OR "Decision Model* notation".ti,ab,kw OR BPMN*.ti,ab,kw OR BPM.ti,kw                                                                                                                                                                                                                   | 368       |
| 2 | 'practice guideline'/de OR 'clinical pathway'/de OR 'clinical protocol'/de OR 'workflow'/de OR 'decision support system'/exp OR 'clinical decision making'/de                                                                                                                                                                                                    | 681,799   |
| 3 | (Decision NEAR/1 (making OR support)).ti,ab,kw OR ((clinical OR medical OR healthcare OR "health care" OR "Patient care") NEAR/2 process*).ti,ab,kw OR ((healthcare OR clinical OR critical OR care) NEAR/2 path*).ti,ab,kw OR guideline*.ti,ab,kw OR Workflow*.ti,ab,kw OR careflow*.ti,ab,kw OR "patient journey".ti,ab,kw OR "Healthcare trajectory".ti,ab,kw | 1,040,782 |
| 4 | #2 OR #3                                                                                                                                                                                                                                                                                                                                                         | 1,381,760 |
| 5 | #1 AND #4                                                                                                                                                                                                                                                                                                                                                        | 117       |
| 6 | #5 AND [01-01-2004]/sd                                                                                                                                                                                                                                                                                                                                           | 112       |

### Academic Search Premier

Date of the search: 09-12-2021

Database limit: No database limit has been apply

| # | Search strategy                                                                                                                                                                                                                                                                                                                                                                           | Results |
|---|-------------------------------------------------------------------------------------------------------------------------------------------------------------------------------------------------------------------------------------------------------------------------------------------------------------------------------------------------------------------------------------------|---------|
| 1 | TI ("Business Process*" N1 (Model* OR Method# OR management)) OR TI "Decision Model* notation" OR TI BPMN* OR TI BPM OR AB ("Business Process*" N1 (Model* OR Method# OR management)) OR AB "Decision Model* notation" OR AB BPMN* OR KW ("Business Process*" N1 (Model* OR Method# OR management)) OR KW "Decision Model* notation" OR KW BPMN* OR KW BPM                                | 2,229   |
| 2 | DE GUIDELINES OR DE "DECISION support systems" OR DE "DECISION making" OR DE "MEDICAL protocols" OR DE "WORKFLOW" OR DE "PATIENT management"                                                                                                                                                                                                                                              | 180,673 |
| 3 | TI (Decision N1 (making OR support)) OR TI ((clinical OR medical OR healthcare OR "health care" OR "Patient care") N2 process*) OR TI ((healthcare OR clinical OR critical OR care) N2 path*) OR TI guideline* OR TI Workflow* OR TI careflow* OR TI "patient journey" OR TI "Healthcare trajectory" OR AB (Decision N1 (making OR support)) OR AB ((clinical OR medical OR healthcare OR | 596,181 |

|   |                                                                                                                                                                                                                                                                                                                                                                                                                                                                                                                            |         |
|---|----------------------------------------------------------------------------------------------------------------------------------------------------------------------------------------------------------------------------------------------------------------------------------------------------------------------------------------------------------------------------------------------------------------------------------------------------------------------------------------------------------------------------|---------|
|   | "health care" OR "PaABent care") N2 process*) OR AB ((healthcare OR clinical OR criABcal OR care) N2 path*) OR AB guideline* OR AB Workflow* OR AB careflow* OR AB "paABent journey" OR AB "Healthcare trajectory" OR KW (Decision N1 (making OR support)) OR KW ((clinical OR medical OR healthcare OR "health care" OR "PaKwent care") N2 process*) OR KW ((healthcare OR clinical OR criKWcal OR care) N2 path*) OR KW guideline* OR KW Workflow* OR KW careflow* OR KW "paKwent journey" OR KW "Healthcare trajectory" |         |
| 4 | S2 OR S3                                                                                                                                                                                                                                                                                                                                                                                                                                                                                                                   | 664,934 |
| 5 | S1 AND S4                                                                                                                                                                                                                                                                                                                                                                                                                                                                                                                  | 390     |
| 6 | S5 AND DT 20040101-20211209                                                                                                                                                                                                                                                                                                                                                                                                                                                                                                | 359     |

### ABI/Inform (ProQuest)

Date of the search: 09-12-2021

Database limit: peer review publications only limit has been apply

| # | Search strategy                                                                                                                                                                                                                                                                                                                            | Results |
|---|--------------------------------------------------------------------------------------------------------------------------------------------------------------------------------------------------------------------------------------------------------------------------------------------------------------------------------------------|---------|
| 1 | TI,AB(("Business Process*" NEAR/1 (Model* OR Method? OR management)) OR "Decision Model* notation" OR BPMN*) OR TI(BPM)                                                                                                                                                                                                                    | 3 110   |
| 2 | SU("Patient care planning") OR SU("Guidelines") OR SU("Decision support systems") OR SU("Decision making")                                                                                                                                                                                                                                 | 305 337 |
| 3 | TI,AB(Decision NEAR/1 (making OR support)) OR TI,AB((clinical OR medical OR healthcare OR "health care" OR "Patient care") NEAR/2 process*) OR TI,AB((healthcare OR clinical OR critical OR care) NEAR/2 path*) OR TI,AB(guideline*) OR TI,AB(Workflow*) OR TI,AB(careflow*) OR TI,AB("patient journey") OR TI,AB("Healthcare trajectory") | 229 017 |
| 4 | 2 OR 3                                                                                                                                                                                                                                                                                                                                     | 447 323 |
| 5 | 1 AND 4                                                                                                                                                                                                                                                                                                                                    | 668     |
| 6 | 5 AND YR(2004-2021)                                                                                                                                                                                                                                                                                                                        | 553     |
| 7 | <i>Peer review publications only limit</i>                                                                                                                                                                                                                                                                                                 | 311     |

### Web of Science

Date of the search: 09-12-2021

Database limit: publications between 01-01-2004 to 09-12-2021 limit has been apply

| # | Search strategy                                                                                                                                                                                                                                                                                                    | Results |
|---|--------------------------------------------------------------------------------------------------------------------------------------------------------------------------------------------------------------------------------------------------------------------------------------------------------------------|---------|
| 1 | TS=("Business Process*" NEAR/1 (Model* OR Method\$ OR management)) OR TS="Decision Model* notation" OR TS=BPMN* OR TI=BPM OR KP=BPM OR AK=BPM                                                                                                                                                                      | 9,832   |
| 2 | TS=("patient decision" NEAR/1 (making OR support)) OR TS=((clinical OR medical OR healthcare OR "health care" OR "Patient care") NEAR/2 process*) OR TS=((healthcare OR clinical OR critical OR care) NEAR/2 path*) OR TS=(guideline*) OR TS=(careflow*) OR TS=("patient journey") OR TS=("Healthcare trajectory") | 692,475 |
| 3 | #1 AND #2                                                                                                                                                                                                                                                                                                          | 475     |

### Google Scholar (<https://harzing.com/resources/publish-or-perish>)

Date of the search: 09-12-2021

Database limit: only up to the 20 first results per string have been considered; publications between 2004 and 2021 limit has been apply ; citations and patents options have been removed

| # | Search                                                                                                          | # Results screened |
|---|-----------------------------------------------------------------------------------------------------------------|--------------------|
| 1 | ("Business Process Model" OR "Business Process Modelling" OR "Business Process Modeling") AND "patient journey" | 20                 |
| 2 | ("Business Process Model" OR "Business Process Modelling" OR "Business Process Modeling" OR                     | 20                 |

For peer review only - <http://bmjopen.bmj.com/site/about/guidelines.xhtml>

|    |                                                                                                |            |
|----|------------------------------------------------------------------------------------------------|------------|
| 1  | "Business Process management") AND "clinical pathways"                                         |            |
| 2  | 3 ("Business Process Model" OR "Business Process Modelling" OR "Business Process Modeling" OR  | 20         |
| 3  | "Business Process management") AND "critical pathways"                                         |            |
| 4  | 4 ("Business Process Model" OR "Business Process Modelling" OR "Business Process Modeling" OR  | 20         |
| 5  | "Business Process management") AND "healthcare pathways"                                       |            |
| 6  | 5 ("Business Process Model" OR "Business Process Modelling" OR "Business Process Modeling" OR  | 20         |
| 7  | "Business Process management") AND "clinical process"                                          |            |
| 8  | 6 ("Business Process Model" OR "Business Process Modelling" OR "Business Process Modeling" OR  | 20         |
| 9  | "Business Process management") AND "medical process"                                           |            |
| 10 | 7 ("Business Process Model" OR "Business Process Modelling" OR "Business Process Modeling" OR  | 20         |
| 11 | "Business Process management") AND "healthcare process"                                        |            |
| 12 | 8 ("Business Process Model" OR "Business Process Modelling" OR "Business Process Modeling" OR  | 20         |
| 13 | "Business Process management") AND "health care process"                                       |            |
| 14 | 9 ("Business Process Model" OR "Business Process Modelling" OR "Business Process Modeling" OR  | 20         |
| 15 | "Business Process management") AND guideline                                                   |            |
| 16 | 10 ("Business Process Model" OR "Business Process Modelling" OR "Business Process Modeling" OR | 20         |
| 17 | "Business Process management") AND guidelines                                                  |            |
| 18 | 11 ("Business Process Model" OR "Business Process Modelling" OR "Business Process Modeling" OR | 20         |
| 19 | "Business Process management") AND "decision support"                                          |            |
| 20 | 12 ("Business Process Model" OR "Business Process Modelling" OR "Business Process Modeling" OR | 1          |
| 21 | "Business Process management") AND "Healthcare trajectory"                                     |            |
| 22 | <b>Total number of results</b>                                                                 | <b>221</b> |





# BMJ Open

## Benefits and Limitations of Business Process Model Notation in Modelling Patient Healthcare Trajectory: A Scoping Review Protocol

|                                 |                                                                                                                                                                                                                                                                                                                                                                                                                                                                                                                                                                                                |
|---------------------------------|------------------------------------------------------------------------------------------------------------------------------------------------------------------------------------------------------------------------------------------------------------------------------------------------------------------------------------------------------------------------------------------------------------------------------------------------------------------------------------------------------------------------------------------------------------------------------------------------|
| Journal:                        | <i>BMJ Open</i>                                                                                                                                                                                                                                                                                                                                                                                                                                                                                                                                                                                |
| Manuscript ID                   | bmjopen-2021-060357.R1                                                                                                                                                                                                                                                                                                                                                                                                                                                                                                                                                                         |
| Article Type:                   | Protocol                                                                                                                                                                                                                                                                                                                                                                                                                                                                                                                                                                                       |
| Date Submitted by the Author:   | 09-Apr-2022                                                                                                                                                                                                                                                                                                                                                                                                                                                                                                                                                                                    |
| Complete List of Authors:       | Kassim, Said; Universite Laval; Laval University Department of Management,<br>Gartner, Jean-Baptiste; Université Laval, Département de management<br>Labbé, Laurence; Laval University, Management<br>Landa, Paolo; Laval University, Operations and Decision Systems<br>Department; Centre de recherche du CHU de Québec, Université Laval<br>Paquet, Catherine; Université Laval Département de management<br>Bergeron, Frédéric; Université Laval<br>Lemaire, Célia; EM Strasbourg Business School<br>Côté, André; Universite Laval Departement de management,<br>Département de management |
| <b>Primary Subject Heading</b>: | Health informatics                                                                                                                                                                                                                                                                                                                                                                                                                                                                                                                                                                             |
| Secondary Subject Heading:      | Medical management, Health services research                                                                                                                                                                                                                                                                                                                                                                                                                                                                                                                                                   |
| Keywords:                       | Quality in health care < HEALTH SERVICES ADMINISTRATION & MANAGEMENT, Health informatics < BIOTECHNOLOGY & BIOINFORMATICS, Organisation of health services < HEALTH SERVICES ADMINISTRATION & MANAGEMENT, Protocols & guidelines < HEALTH SERVICES ADMINISTRATION & MANAGEMENT                                                                                                                                                                                                                                                                                                                 |
|                                 |                                                                                                                                                                                                                                                                                                                                                                                                                                                                                                                                                                                                |

SCHOLARONE™  
Manuscripts



# 1 Benefits and Limitations of Business Process Model Notation in Modelling

## 2 Patient Healthcare Trajectory: A Scoping Review Protocol

### 3 Running title: Modelling Patient Healthcare Trajectory using BPMN

4 Kassim Said Abasse<sup>1,2,3,4,5</sup>, Jean-Baptiste Gartner<sup>1,2,3,5</sup>, Laurence Labbé<sup>1,2</sup>, Paolo Landa<sup>3,6\*</sup>,

5 Catherine Paquet<sup>3,8,9</sup>, Frédéric Bergeron<sup>10</sup>, Célia Lemaire<sup>11</sup>, André Côté<sup>1,2,3,4,5</sup>.

6 <sup>1</sup>Département de management, Faculté des sciences de l'administration, Université Laval,  
7 Québec, G1V 0A6, Canada.

8 <sup>2</sup>Centre de recherche en gestion des services de santé, Université Laval, Québec, G1V 0A6,  
9 Canada.

10 <sup>3</sup>Centre de recherche du CHU de Québec, Université Laval, Québec, G1V 0A6, Canada

11 <sup>4</sup>VITAM, Centre de recherche en santé durable, Université Laval, Québec, G1V 0A6, Canada.

12 <sup>5</sup>Centre de recherche du CISSS de Chaudière-Appalaches, Québec, G1V 0A6, Canada.

13 <sup>6</sup>Département d'opérations et systèmes de décision, Faculté des sciences de l'administration  
14 Université Laval, Québec, G1K 7P4, Canada

15 <sup>8</sup>Département de marketing, Faculté des sciences de l'administration, Université Laval,  
16 Québec, G1V 0A6, Canada.

17 <sup>9</sup>Centre NUTRISS-Nutrition, Santé et société Université Laval, Québec, G1V 0A6, Canada.

18 <sup>10</sup>Bibliothèque, Direction des services-conseils, Université Laval, Québec, G1V 0A6, Canada

19 <sup>11</sup>Université de Strasbourg, EM Strasbourg-Business School, HuManiS, Strasbourg, France.

#### 20 \*Corresponding Author

21 Paolo Landa, Ph.D

22 Professeur Adjoint

23 Département d'opérations et systèmes de décision

24 Faculté des sciences de l'administration

25 Université Laval, Québec, QC, G1V 0A6, Canada

26 Local 2421, Tel :(+1)418-656-2131 (Ext. 413389)

27 Email: [Paolo.Landa@fsa.ulaval.ca](mailto:Paolo.Landa@fsa.ulaval.ca).

## 46 **Abstract**

47 **Introduction:** The adoption of business process model notation (BPMN) in modelling  
48 healthcare trajectory can enhance the efficiency and efficacy of healthcare organizations,  
49 improve patient outcomes while restraining costs. Existing systematic reviews have been  
50 inconclusive regarding the effectiveness of BPMN in modelling healthcare trajectory. The aims  
51 of this scoping review are to map and aggregate existing evidence on the benefits and  
52 limitations associated with BPMN in healthcare trajectory, highlighting areas of improvement  
53 on BPMN and its extensions in healthcare. We will assess BPMN's ability to model key  
54 dimensions or concepts of the healthcare process and to meet the needs of stakeholders. The  
55 review will highlight the advantages of this approach to support clinical activities and decision-  
56 making processes associated with the healthcare trajectory, proposing a conceptual framework  
57 for improving the use of BPMN in healthcare.

58 **Methods and Analysis:** This study will be performed in accordance with the methodological  
59 framework suggested by Arksey and O'Malley. A wide range of electronic databases and grey  
60 literature sources will be systematically searched using predefined keywords. The review will  
61 include any study design focusing on the application of the BPMN approach for optimising  
62 healthcare trajectories, published in either English or French from January 2004 to December  
63 2021. Two reviewers will independently screen titles, abstracts, and full-text articles and select  
64 articles meeting the inclusion criteria. A customised data extraction form will be used to extract  
65 data. The results will be presented using descriptive statistics and thematic analysis on  
66 qualitative data.

67 **Ethics and dissemination:** Research ethics approval is not required. Review findings will be  
68 used to advance understanding about BPMN, its extensions and application in healthcare  
69 trajectory optimisation. The review will develop recommendations on tailoring BPMN  
70 strategies for optimising care pathways and decision-making processes. Findings will be  
71 disseminated in peer-reviewed journals, conferences and discussions with relevant  
72 organizations and stakeholders.

73 **Keywords:** Healthcare trajectory, healthcare management, business process modelling  
74 notation, healthcare processes, care pathways, scoping review

75

76

77

78

79

### Strengths and limitations of this study

- ❖ This is the first scoping review that will analyse how BPMN interventions improve organizational practices, clinical practices, and patient outcomes in healthcare organizations.
- ❖ Our scoping review will conform to the rigorous methodology indicated by Arksey and O'Malley, and improved by Levac et al. and further refined by the Joanna Briggs Institute (JBI)
- ❖ Both peer-reviewed and grey literature will be considered to ensure a comprehensive coverage.
- ❖ The studies were selected limiting them to French and English language and we consider only the studies published between 2004 and 2021.
- ❖ The quality appraisal of publications captured will not be assessed, as it is beyond the aim of a scoping review.

## 114 INTRODUCTION

115 With the continuous challenges facing healthcare organizations in the past few years<sup>1-3</sup>, many  
116 strategies have focused on process improvements with the objective of enhancing efficiency  
117 and efficacy to improve patient outcomes while controlling costs<sup>4,5</sup>. Through the years, health  
118 expenditure and financing has increased substantially in developed countries such as the United  
119 States (US) and Canada<sup>6-9</sup>. In 2019, Canada spent 10.8% of its gross domestic product on  
120 healthcare expenses according to the Organization for Economic Cooperation and  
121 Development (OECD, 2021)<sup>9</sup>. This ratio reached 17.7% at the same time in the US, where the  
122 national health spending is projected to reach \$6.2 trillion by 2028, growing at an average  
123 annual rate of 5.4%<sup>8,9</sup>. However, compared with other OECD countries, the US perform poorly  
124 on process, outcome, and patient experience metrics, as well as life expectancy<sup>10,11</sup>. Life  
125 expectancy in the US was the lowest at 78.8 years compared with a range from 80.7 to 83.9  
126 years for other OECD countries<sup>10</sup>. The infant mortality rate in the US was 5.8 per 1000 live  
127 births and the maternal mortality rate was 17.4 per 100 000 births in 2018, both higher than the  
128 mean rates for any OECD country<sup>11-15</sup>. Canada is another developed country performing poorly  
129 in terms of infant and maternal mortality, with 4.7 fatalities out of every 1,000 live births and  
130 10.2 maternal deaths per 100 000 births<sup>11,16</sup>.

131 The lack of control in processes used to deliver medical care is clearly a major problem in the  
132 context of preventable medical errors with lethal damages and high economic costs in many  
133 hospitals<sup>17-19</sup>. Since the released *Crossing the Quality Chasm*<sup>20,21</sup> by the Institute of Medicine  
134 (US), numerous national and international organizations including the Academies of  
135 Sciences<sup>22</sup> and the World Health Organization<sup>23,24</sup> have made repeated calls to develop a  
136 framework for advancing the quality of care, ensuring that care is safe, effective, efficient,  
137 patient-centred, timely, and equitable<sup>20</sup>. To do this, healthcare organizations and systems must  
138 develop solutions that enhance both efficiency and efficacy of improving healthcare  
139 organization and patient outcomes while restraining costs. Efforts to improve clinical and care  
140 pathways have shown such benefits<sup>25-27</sup>. Over the last decades, articles have revealed that  
141 mapping healthcare trajectories allowed to decrease the variation of professional practices and  
142 to standardise care processes<sup>17-19</sup>. This practice has many benefits such as improving the  
143 accessibility, fluidity, quality, performance, and sustainability of healthcare services<sup>25,28</sup>.

144 In this context, several tools have been developed to support process improvement through  
145 process mapping. Among these methods, business process modelling notation (BPMN) is an  
146 approach that consists of representing processes as a network of activities and tasks<sup>29-31</sup>. This  
147 structured approach supported by the Object Management Group since 2005 and adopted as an

1  
2  
3 148 international standard by the International Organization for Standardization since 2012, is in  
4  
5 149 its second version (BPMN 2.0)<sup>30-32</sup>.

6 150 In recent years, a few reviews<sup>33-36</sup> have been conducted to analyse whether the BPMN  
7  
8 151 approach can become a useful tool to improve the effectiveness and quality of healthcare  
9  
10 152 processes. For instance, Loya et al.<sup>33</sup> used a service-oriented architecture in clinical decision  
11  
12 153 support and provided evidence that BPMN was not commonly used for clinical decision  
13  
14 154 support systems, despite being the preferred standard for business process modelling in  
15  
16 155 healthcare. Mincarone et al.<sup>34</sup> demonstrated that BPMN provides a good level of formalisation,  
17  
18 156 a standardised communication framework between multiple stakeholders, good user  
19  
20 157 comprehensibility, and easier interprofessional analyses. Fernández et al.<sup>35</sup> suggested that  
21  
22 158 BPMN is useful for standardising processes that have some variability due to its possibility to  
23  
24 159 incorporate variations or changes. Moreover, Zarour et al.<sup>36</sup> analysed various BPMN  
25  
26 160 extensions (e.g., decision modelling notation) that can be used to improve its efficiency in many  
27  
28 161 domains, showing that healthcare was among the most targeted area. The overall conclusion of  
29  
30 162 these reviews<sup>33-36</sup> is that BPMN seems to be increasingly used in healthcare organizations to  
31  
32 163 the point of becoming a standard in process improvement methods. However, these articles<sup>33-  
33  
34 164 36</sup> acknowledged the difficulties and challenges when implementing BPMN in the health sector.  
35  
36 165 Indeed, a limitation of these articles<sup>33-36</sup> is that none of them put the use of BPMN to improve  
37  
38 166 healthcare trajectories or patient care trajectory as its primary focus. Loya et al.<sup>33</sup> focused on  
39  
40 167 the use of BPMN for supporting clinical decisions and stated that BPMN has potential to  
41  
42 168 optimise clinical pathways, but they did not assess this possibility. The papers of Mincarone et  
43  
44 169 al.<sup>34</sup> and Fernández et al.<sup>35</sup> mainly focused on clinical processes, briefly addressing healthcare  
45  
46 170 trajectories, resulting in a shallow analysis on this subject. Finally, Zarour et al.<sup>36</sup> targeted many  
47  
48 171 BPMN extensions that could improve its effectiveness, but their research was not exclusive to  
49  
50 172 healthcare setting.

51  
52 173 Our literature review builds on these previous reviews<sup>33-36</sup> by providing an in-depth analysis  
53  
54 174 of the ability of BPMN to effectively improve the quality of clinical practices, the security, and  
55  
56 175 the fluidity of the care process and to propose tangible results on the patient experience in a  
57  
58 176 patient-centred care and services logic. Moreover, we will analyse the opportunities and  
59  
60 177 limitations related to the integration of BPMN extension.

61  
62 178 Considering the above gaps in the literature, the primary aim of this scoping review is to  
63  
64 179 identify and map existing evidence on the main benefits and limitations associated with the use  
65  
66 180 of BPMN in healthcare trajectory modelling. To do so, we will assess its ability to model key  
67  
68 181 dimensions or concepts of the healthcare process and to meet the needs of stakeholders. The

1  
2  
3 182 review will also highlight the capacity of the BPMN approach and its extensions to support  
4  
5 183 clinical activities and decision-making processes associated with the healthcare trajectory and  
6  
7 184 propose a conceptual framework for improving the use of BPMN in healthcare practices.

## 8 185 **METHODS AND ANALYSIS**

9  
10 186 We chose to undertake a scoping review as the best method to map the available evidence  
11  
12 187 regarding the benefits and limitations of BPMN in modelling patient healthcare trajectory<sup>37-39</sup>.  
13  
14 188 The present review will be conducted following the methodological frameworks described by  
15  
16 189 Arksey and O'Malley<sup>37</sup>, and improved by Levac et al.<sup>38</sup>, and further refined by the Joanna  
17  
18 190 Briggs Institute (JBI)<sup>40</sup>. The standardized methodology included six stages for scoping review:  
19  
20 191 (1) Identifying the research question, (2) Identifying relevant articles and grey literature, (3)  
21  
22 192 Selecting articles, (4) Charting the data, (5) Collating, summarizing, and reporting the data,  
23  
24 193 and (6) Consulting with relevant stakeholders, thereby enabling knowledge translation. The  
25  
26 194 Preferred Reporting Items for Systematic Reviews and Meta-Analysis Extension for Scoping  
27  
28 195 Reviews (PRISMA-ScR)<sup>39,41</sup> has also been used to guide the reporting of this protocol and will  
29  
30 196 also subsequently be used to structure the reporting of the full review. Furthermore, we will  
31  
32 197 take an iterative and reflexive approach throughout the review process, particularly to refine  
33  
34 198 our study selection and data extraction steps to the best target meeting our objective. This  
35  
36 199 protocol is registered through the Open Science Framework<sup>42</sup>.

### 34 200 **Stage 1: Identifying the Research Question**

36 201 As the focus of scoping reviews is on summarizing the breadth of evidence, the research  
37  
38 202 questions should be broad while keeping in mind the review's main purpose<sup>37,38,40,41</sup>. Thus, we  
39  
40 203 started with, "What is known about the application of BPMN methodology in healthcare  
41  
42 204 organization?" A preliminary search was conducted through some electronic databases  
43  
44 205 including International Prospective Register of Systematic Reviews, JBI Database of  
45  
46 206 Systematic Reviews and Implementation Reports, Cochrane Database of Systematic Reviews,  
47  
48 207 and National Center for Biotechnology Information, which revealed three systematic reviews  
49  
50 208 of modelling healthcare processes using the BPMN methodology<sup>33-36</sup>. Although findings from  
51  
52 209 these reviews<sup>33-36</sup> supported the use of BPMN as an effective methodology to optimise  
53  
54 210 healthcare processes, no conclusion on the effectiveness were drawn. The reason may be that  
55  
56 211 these reviews<sup>33-36</sup> were not mainly focused on the use of BPMN to improve healthcare  
57  
58 212 trajectories.

56 213 In addition, we adopted the JBI's Population Concept and Context (PCC) framework<sup>40</sup> to  
57  
58 214 formulate the objectives and research questions, and to conceptualise the study and report  
59  
60



1  
2  
3 215 characteristics in terms of eligibility criteria (**Table 1**). We then consulted with experienced  
4  
5 216 colleagues<sup>30</sup> on our predefined set of questions to provide further input and feedback.

6  
7 217 In line with our purpose to comprehensively map the extent, range and nature of evidence  
8  
9 218 examining the use or application of BPMN within the healthcare trajectory, we formulated four  
10  
11 219 specific research questions to guide this review.

- 12 220 1. What are the objectives for using BPMN in healthcare organization? What are the  
13  
14 221 expected results and what are the needs to be met?
- 15 222 2. What are the key variables, elements, concepts, and dimensions targeted by the BPMN  
16  
17 223 approach?
- 18  
19 224 3. Can the BPMN approach meet these expectations in healthcare trajectory? Specifically,  
20  
21 225 a. What are the strengths (advantages) and weaknesses (limitations) of the BPMN in  
22  
23 226 modelling healthcare trajectory?  
24  
25 227 b. What are the effectiveness of using BPMN approach and its extensions in modelling  
26  
27 228 healthcare trajectory?  
28  
29 229 c. What are their opportunities and constraints in modelling healthcare processes?
- 30  
31 230 4. What are the improvements or alternatives proposed to optimising healthcare trajectory?

32  
33 231 For the purposes of this review, the term healthcare trajectory focuses on the patient's care  
34  
35 232 pathway across the continuum of care. Thus, it can be the clinical pathway when it focuses on  
36  
37 233 the organizational scale, but also the care pathway when it focuses on the systemic scale. It  
38  
39 234 consists first of the patient's journey through the sequencing of tasks and activities at all points  
40  
41 235 of contact<sup>43,44</sup>. It then integrates the professional actors involved in the care trajectory,<sup>45,46</sup> the  
42  
43 236 operation management of care delivery processes<sup>47,48</sup>, the coordination structures<sup>49-51</sup>, the  
44  
45 237 structural context of the system and organizations<sup>52,53</sup> as well as the information trajectory  
46  
47 238 along the healthcare trajectory<sup>54,55</sup>. Thus, our understanding of the term healthcare trajectory is  
48  
49 239 not limited to the operational aspect of the care process and to the pathophysiological process  
50  
51 240 of a patient's disease state, but also refers to the organization of all activities surrounding  
52  
53 241 interactions between health care workers and patients, as well as the effectiveness of patient  
54  
55 242 care processes and their effectiveness.

56  
57 243 Therefore, our analysis will consider not only the operational outcomes of the application  
58  
59 244 BPMN, but also its societal impact by assessing its potential to improve patient outcomes and  
60  
245 experience. In addition, healthcare process mapping includes several different flows. On one  
246  
247 hand, the main process follows the patient's journey through the process steps and the decision  
248  
secondary flows include steps directly or indirectly linked to the main process such as

1  
2  
3 249 administrative processes, information flow, organizational processes, and examinations that do  
4  
5 250 not require the presence of the patient (e.g., laboratory results, pathological tests). Thus, several  
6  
7 251 flows can be present and impact the care process (e.g., information flow, drug flow, blood  
8  
9 252 flow,).

10 253 Therefore, this scoping review will focus on the potential of the BPMN and all its components  
11  
12 254 to impact the results of healthcare trajectories directly or indirectly. Finally, the review will  
13  
14 255 also consider proposals for extensions to BPMN have been put forward to integrate evidence-  
15  
16 256 based medicine and guidelines to support clinical decision making, including the Decision  
17  
18 257 Modelling Notation proposed by both the Object Management Group<sup>56,57</sup> and the Computer  
19  
20 258 Interpretable Guidelines<sup>58,59</sup>.

21 259  
22 260  
23  
24  
25  
26  
27  
28  
29  
30  
31  
32  
33  
34  
35  
36  
37  
38  
39  
40  
41  
42  
43  
44  
45  
46  
47  
48  
49  
50  
51  
52  
53  
54  
55  
56  
57  
58  
59  
60



261 **Table 1:** PCC framework<sup>40</sup> for illustrating the scope and defining inclusion and exclusion criteria of the review

|                   | Inclusion                                                                                                                                                                                                                                                                                                                                                                                                                                                                                                                                                                            | Exclusion                                                                                                                                                                                                                                                                                                                                                                                                                                         |
|-------------------|--------------------------------------------------------------------------------------------------------------------------------------------------------------------------------------------------------------------------------------------------------------------------------------------------------------------------------------------------------------------------------------------------------------------------------------------------------------------------------------------------------------------------------------------------------------------------------------|---------------------------------------------------------------------------------------------------------------------------------------------------------------------------------------------------------------------------------------------------------------------------------------------------------------------------------------------------------------------------------------------------------------------------------------------------|
| Population        | Participants of interest are the healthcare stakeholders (knowledge users) involved directly or indirectly with the use of BPMN during the healthcare trajectory or clinical process. The healthcare stakeholders (knowledge users) will include patients, healthcare professionals (e.g., nurses, physicians, other professionals), administrators and decision-makers who were involved at least once in the healthcare trajectory or clinical processes (clinical or care pathways).                                                                                              | Literature that does not apply BPMN in health trajectory (e.g., healthcare process, clinical process, process of care, patient care process, healthcare trajectory, clinical pathways, patient care management). Since we are interested in the efficacy and limitations of BPMN in healthcare trajectory, this needs to be evidence-based (analyse a case clinical pathway) and not speculative.                                                 |
| Concept           | The concept is the application of BPMN in healthcare trajectory and/or clinical processes to evaluate the capacity of BPMN to optimise healthcare performance. Articles that reported any healthcare intervention and/or clinical processes modelling with BPMN, including the improvement of the quality assessment and decision-making processes, the capacity to understand the internal clinical procedures, the ability to communicate those procedures in a standard manner, the ability to adjust to new internal challenges quickly and patients' outcomes will be included. |                                                                                                                                                                                                                                                                                                                                                                                                                                                   |
| Context           | The context for this review will consider articles conducted in any clinical setting (e.g., inpatient, outpatient) or healthcare settings (e.g., hospitals, health centres, nursing homes). Articles conducted in any part of the world are eligible to be included in this review                                                                                                                                                                                                                                                                                                   | Literature related to BPMN occurring outside of healthcare trajectory (e.g., clinical process, process of care, patient care process, patient trajectory, clinical pathways, patient care management)                                                                                                                                                                                                                                             |
| Types of evidence | Reviews (e.g., systematic, or narrative reviews), peer-reviewed research articles, full-text articles are specific to modelling patient care trajectory incorporate the use of BPMN as a methodological approach and published in either English or French.                                                                                                                                                                                                                                                                                                                          | Articles published before 2004, not written in either English or French. Editorial articles, abstracts or posters, protocols for planned articles, strategy, or guidelines. Articles where full text is unavailable. Study do not indicate the use of BPMN as a methodological approach. Study focuses on other healthcare elements, such as professional development and performance management but not specifically on patient care trajectory. |

262

## 263 **Stage 2: Identifying Relevant Articles**

264 A comprehensive search strategy was developed with the assistance of an experienced health  
265 sciences librarian (FB). The search strategy will follow the three-step approach recommended  
266 by JBI scoping review guidelines<sup>40</sup> and will target the retrieval of both published and  
267 unpublished articles from electronic searches databases, focusing to BPMN modelling of  
268 patient care trajectory. The first step of the scoping review guidelines has been completed in  
269 preparation of this protocol (**Table 1**), which involved an initial limited search on PubMed and  
270 ABI/Inform (ProQuest) databases, using the following selected keywords: "Healthcare  
271 Process" OR "Clinical Process " OR "Process of Care" OR "Clinical Pathways" OR "Patient  
272 care Process" OR "Healthcare trajectory" OR Patient Care Management" OR "Critical  
273 Pathways" OR "Clinical Healthcare Pathways" AND "Business Process Model" OR "Business  
274 Process Modelling Notation" OR "Business Process Model" OR "BPMN modelling" OR  
275 "Workflow" OR "Clinical Decision-Making" OR "Decision Support Systems" OR "Medical  
276 Process". The index words and the text words in the title and abstract of retrieved articles were  
277 analysed to identify search terms and refine the search strategy for the next step.

278 In the second step, the search strategy will be adapted and implemented for each included  
279 information source (PubMed, Embase (Embase.com), CINAHL(EBSCO), Web of Science,  
280 ABI/Inform (ProQuest), Academic Search Premier (EBSCO), and Google Scholar) for  
281 potential eligible articles published in either English or French language, from 2004, year when  
282 BPMN was initially developed by the Business Process Management Institute, until December  
283 2021. In addition to the electronic database search, we will undertake a backward snowballing<sup>60</sup>  
284 search that will involve hand-searching the reference lists of the identified reviews<sup>33-36,61</sup> in  
285 order to find other relevant articles. We will also perform a hand search of some relevant  
286 journals (e.g. Institute of Electrical and Electronics Engineers, Health Informatics Journal, IOS  
287 Press - Studies in Health Technology and Informatics, Journal of Digital Imaging, Lecture  
288 Notes in Artificial Intelligence, Springer Procedia Computer Science, Recent Advances in  
289 Computer Engineering, Information Systems Journal , European Journal of Information  
290 System, Lecture Notes in Business Information Processing), search citations of relevant papers  
291 and scan the reference lists of relevant papers. The final search results will be exported to the  
292 Covidence systematic review software<sup>62,63</sup> where duplicates will be removed. The full detailed  
293 search strategy for peer review and grey literature sources is included in **online**  
294 **Supplementary Appendix I.**

## 295 **Stage 3: Selecting Literature for Inclusion**

1  
2  
3 296 All retrieved articles will undertake two levels of screening. First, two reviewers (KSA and  
4 297 JBG or LL) will independently screen titles and abstracts of each article against the established  
5 298 inclusion and exclusion criteria (**Table 1**). To increase the reliability of screening by the two  
6 299 reviewers (KSA and JBG or LL), a pilot test will be conducted on 50 titles and abstracts to  
7 300 evaluate reviewer agreement in the screening process. Discrepancies will be resolved through  
8 301 discussion between the two reviewers and where agreement could not be reached, a third  
9 302 reviewer (PL, CP, CL, or AC) will be consulted. Adjustments may also be made to the inclusion  
10 303 criteria if necessary to ensure consistent interpretation and application of the criteria. The  
11 304 researchers will discuss their selection of articles after this first round of screening, to arrive at  
12 305 preliminary consensus on the list of eligible articles. In the second step, the two reviewers will  
13 306 screen the full-text articles independently to determine if they meet the inclusion criteria.  
14 307 Reasons for the exclusion of full-text articles will be noted in Covidence<sup>63</sup> by each reviewer.  
15 308 Reviewers will again discuss their selection of articles after this second round of screening, to  
16 309 arrive at a final list of eligible articles. Discrepancies will again be resolved through discussion  
17 310 between the two reviewers and where agreement could not be reached, a third reviewer will be  
18 311 consulted. The screening process will be documented using a PRISMA flowchart for scoping  
19 312 review<sup>39,41</sup> and by calculating the inter-rater reliability between reviewers using the Cohen's  
20 313 Kappa coefficient<sup>64</sup>.

#### 314 **Stage 4: Charting of Information and Data**

315 Data will be extracted from every eligible article using a data extraction chart (**Charting**  
316 **Table**) tailored to the research questions. Its aim is to maintain a manageable amount of data,  
317 while ensuring a wide approach and breadth of coverage to obtain existing evidence on the  
318 benefits and limitations associated with BPMN in patient care trajectory. Two researchers  
319 (KSA and JBG or LL) will independently extract the following study information: authorship,  
320 year of publication, country of origin, study purpose, patient care trajectory issues being  
321 addressed (e.g., diabetes, chronic obstructive pulmonary disease, coronary heart disease,  
322 clinical pathways for contraception), study population/target users (e.g., physicians, clinicians,  
323 nurses, pharmacists), setting/location of intervention (e.g., primary care, acute care,  
324 rehabilitation, home care, long-term care, community, hospital), methodological approach  
325 (qualitative, quantitative, or mixed study), expected results study findings (e.g., decreasing  
326 diagnostic delay, optimising of quality care, cost, reducing medical errors, standardising the  
327 decision-making process), type of outcomes/dimension analysed (e.g., diagnostic times,  
328 waiting time for surgery, flexibility, improving key performance indicators, decision support  
329 systems). We will note the objectives and benefits, as well the limitations of using BPMN and

1  
2  
3 330 BPMN-extension approach. The proposed Charting Table is shown in **online Supplementary**  
4 **Appendix II**. It will be trialled on five included articles and will be iteratively refined.  
5 331  
6 332 Adjustments or expansions may also be made to the **Charting Table** if necessary to ensure  
7  
8 333 that the research objectives or questions are well addressed. For instance, we may add  
9  
10 334 additional categories of data deemed relevant to answer the research questions to the Charting  
11  
12 335 Table.

### 13 336 **Stage 5: Collating, Summarizing, and Reporting the Data**

14  
15 337 The main findings of the included articles will be summarised in Tabular format in a manner  
16  
17 338 that reflects the objectives of the review. Following the PCC principles<sup>40</sup>, a narrative summary  
18  
19 339 will accompany the Tabular results and link the different findings to the review objective and  
20  
21 340 questions and will identify any knowledge gaps in the literature. To ensure rigour in this stage,  
22  
23 341 two reviewers (KSA and JBG or LL) will prepare a descriptive summary table of the extracted  
24  
25 342 data and will highlight the key findings with input from the research team. The table will  
26  
27 343 include a descriptive summary of the articles and a qualitative thematic analysis of the main  
28  
29 344 results regarding characteristics of the BPMN approach used in each study (e.g., objective,  
30  
31 345 benefit, challenges, target users, redesign the clinical process), type of patient trajectory,  
32  
33 346 characteristics of the research designs, outcomes of interest used to measure the effectiveness  
34  
35 347 of BPMN (e.g., reducing work time, and challenges and potential solutions learned). We will  
36  
37 348 identify barriers or limitations of BPMN for achieving improvement of healthcare processes,  
38  
39 349 support activities and decision-making processes, and use that information to address our main  
40  
41 350 objectives. The consultation stage of the scoping review, described in the following section,  
42  
43 351 will contribute to fulfilling that objective and to establish a conceptual framework for  
44  
45 352 improving the use of BPMN in healthcare trajectory modelling. Finally, if the extracted data  
46  
47 353 allow it, a qualitative analysis will be conducted to discuss or nuance the evidence of BPMN  
48  
49 354 effectiveness considering potential barriers and enablers identified by the authors. We will use  
50  
51 355 the PRISMA-ScR to guide the final reporting of our results.

### 52 356 **Stage 6: Consultation**

53  
54 357 The final consultation stage offers an ideal mechanism to enhance the validity of the study  
55  
56 358 outcome while translating findings with the stakeholders or health professionals and patients<sup>38</sup>.  
57  
58 359 Preliminary findings from this review will provide the background for workshop with the  
59  
60 360 research team and stakeholders/knowledge users (e.g., healthcare professionals, patients,  
61  
62 361 decision-makers, administrators). The objectives of the workshop are to present and discuss  
63  
64 362 the interim results of the synthesis. The meeting will generate a list of key practice  
65  
66 363 recommendations, dissemination strategy and research priority areas to inform future research.

1  
2  
3 364 The workshop will be conducted with the research team with a focus on reviewing the results  
4  
5 365 following feedback from the previous meeting, reviewing the final report, necessary  
6  
7 366 modifications to findings and recommendations for precision and clarity. These consultations  
8  
9 367 with all stakeholders, including clinicians, technicians, and patients, aim to materialise the  
10  
11 368 findings of this review by discussing their applications in specific contexts. Therefore, despite  
12  
13 369 Arksey and O'Malley<sup>37</sup> stated that consultation is optional, we find that our study is a  
14  
15 370 fundamental step. Consequently, we plan to organise a workshop with all stakeholders in order  
16  
17 371 to get their feedback on the findings and to develop next steps in research and practice. The  
18  
19 372 feedback from the stakeholder workshop and the results of the scoping review will be combined  
20  
21 373 to clearly indicate the available evidence, gaps in research and future research priorities for  
22  
23 374 improving the use of BPMN in healthcare trajectory modelling.

### 24 375 **Patient and public involvement**

25 376 In this study, patient and public involvement will be performed at the consultation stage and  
26  
27 377 dissemination. Patients will be recruited from the Institut Universitaire de Cardiologie et de  
28  
29 378 Pneumologie de Québec - Université Laval (IUCPQ-UL). We will work together with the  
30  
31 379 IUCPQ-UL patient office for the recruitment and consultation of patient partners. Our  
32  
33 380 consultation strategy comprises involving not only patients with specific health trajectory but  
34  
35 381 also caregivers, healthcare and social professionals, and policymakers at different levels. It is  
36  
37 382 expected that their contribution in the discussion of the scoping review results will inform the  
38  
39 383 next steps of the project regarding the ability of BPMN to effectively improve the quality of  
40  
41 384 clinical practices, the security, and the fluidity of the care process. Therefore, our analysis will  
42  
43 385 consider not only the operational outcomes of the application BPMN, but also its societal  
44  
45 386 impact by considering the patient's health trajectory in healthcare organization.

### 46 387 **ETHICS AND DISSEMINATION**

47 388 This scoping review is exempt from ethics approval because the work carried out will be based  
48  
49 389 on published documents. The involvement of relevant study participants does not imply  
50  
51 390 personal data collection, rather, we seek to have the key persons feedback on the information  
52  
53 391 gathered through the bibliographic review. The aim of this project is to synthesise the literature  
54  
55 392 about healthcare trajectory using BPMN approach to enhance conceptual clarity and  
56  
57 393 understanding about key benefits and limitations and to extrapolate from this evidence base  
58  
59 394 promising conceptual framework for improving the use of BPMN in healthcare trajectory.  
60  
395 During the development of the scoping review a patient-partner will be engaged as a consultant  
396 and knowledge user. We anticipate the research will provide several key outputs including (1)  
397 a comprehensive review that will summarize existing literature on the BPMN approach; (2) an

1  
2  
3 398 evidence base demonstrating the benefits and limitation of the BPMN approach in modelling  
4  
5 399 patient trajectory; (3) a list of BPMN extensions that can be used to improve its efficiency in  
6  
7 400 many domains; (4) a conceptual framework. Our findings will be disseminated in peer-  
8  
9 401 reviewed journals, workshop, seminars, and presentations and through discussions with  
10  
11 402 relevant organizations, study participants and stakeholders. Our goal will be to disseminate our  
12  
13 403 findings to a wide range of clinicians, leaders, and administrators in all sectors, to researchers  
14  
15 404 and to students entering the healthcare professions to enhance understanding about key benefits  
16  
17 405 and limitations of BPMN approach for optimising the patient trajectory. We believe the results  
18  
19 406 will benefit clinicians by guiding their decision-making throughout the patient's trajectory,  
20  
21 407 therefore reducing the medical error rate, optimising efficient resource management, and  
22  
23 408 reducing the risks of complications due to poor clinical decisions. Those improvements should  
24  
25 409 result in an optimisation of cost-efficiency for organizations and quality of care for patients.

26 410 **Contributors:** KSA, JBG and AC led the design, search strategy and conceptualisation of this  
27  
28 411 work and drafted the protocol. PL, FB, CL and CP were involved in the conceptualisation of  
29  
30 412 the review design, inclusion and exclusion criteria and provided feedback on the methodology  
31  
32 413 and the manuscript. KSA and LL were involved in data extraction forms. All authors provided  
33  
34 414 feedback on the manuscript and approval to the publishing of this protocol manuscript.

35 415 **Funding** None.

36 416 **Competing interests:** The authors declare no potential conflict of interest

37 417 **Patient and public involvement:** A patient-partner will be engaged throughout the study  
38  
39 418 acting as a consultant and knowledge user.

40 419 **Patient consent for publication:** Not required.

41 420 **Ethics approval: Research** ethics approval is not required for a scoping review.

42 421 **Provenance and peer review:** Not commissioned; externally peer reviewed.

43 422 **Acknowledgements:** The authors thank the IUCPQ-UL for the future collaboration with the  
44  
45 423 patient's groups. We also thank Nathalie Thibault, Director of Nurse care at IUCPQ-UL, and  
46  
47 424 Sophie Bellavance, Director of multidisciplinary services at IUCPQ-UL, for the availability in  
48  
49 425 the collaboration within this project.

50 426

51 427

52 428

53 429

## Reference

- 54 430 1. McMahan M, Nadigel J, Thompson E, Glazier RH. Informing Canada's health system  
55 431 response to COVID-19: priorities for health services and policy research. *Healthcare*  
56 432 *Policy*. 2020;16(1):112.



- 1  
2  
3 433 2. Smylie J, Anderson M. Understanding the health of Indigenous peoples in Canada:  
4 434 key methodological and conceptual challenges. *Cmaj*. 2006;175(6):602-602.
- 5 435 3. Smylie J, Firestone M. Back to the basics: Identifying and addressing underlying  
6 436 challenges in achieving high quality and relevant health statistics for indigenous  
7 437 populations in Canada. *Statistical Journal of the IAOS*. 2015;31(1):67-87.
- 8 438 4. Cortada J, Gordon D, Lenihan B. The value of analytics in healthcare: From insights  
9 439 to outcomes. *IBM Global Business Services, Executive Report*. 2012.
- 10 440 5. Contandriopoulos D, Brousselle A, Larouche C, et al. Healthcare reforms, inertia  
11 441 polarization and group influence. *Health Policy*. 2018;122(9):1018-1027.
- 12 442 6. Himmelstein DU, Campbell T, Woolhandler S. Health care administrative costs in the  
13 443 United States and Canada, 2017. *Annals of internal medicine*. 2020;172(2):134-142.
- 14 444 7. Liu C, Tsugawa Y, Weiser TG, Scott JW, Spain DA, Maggard-Gibbons M.  
15 445 Association of the US Affordable Care Act with out-of-pocket spending and  
16 446 catastrophic health expenditures among adult patients with traumatic injury. *JAMA*  
17 447 *network open*. 2020;3(2):e200157-e200157.
- 18 448 8. Keehan SP, Cuckler GA, Poisal JA, et al. National Health Expenditure Projections,  
19 449 2019–28: Expected Rebound In Prices Drives Rising Spending Growth: National  
20 450 health expenditure projections for the period 2019–2028. *Health Affairs*.  
21 451 2020;39(4):704-714.
- 22 452 9. OCDE. *Health at a Glance 2021*. 2021.
- 23 453 10. Papanicolas I, Woskie LR, Jha AK. Health Care Spending in the United States and  
24 454 Other High-Income Countries. *JAMA*. 2018;319(10):1024-1039.
- 25 455 11. Emanuel EJ, Gudbranson E, Van Parys J, Gørtz M, Helgeland J, Skinner J.  
26 456 Comparing health outcomes of privileged US citizens with those of average residents  
27 457 of other developed countries. *JAMA internal medicine*. 2021;181(3):339-344.
- 28 458 12. Singh GK, Stella MY. Infant mortality in the United States, 1915-2017: large social  
29 459 inequalities have persisted for over a century. *International Journal of Maternal and*  
30 460 *Child Health and AIDS*. 2019;8(1):19.
- 31 461 13. Declercq E, Zephyrin L. Maternal mortality in the United States: a primer.  
32 462 *Commonwealth Fund*. 2020.
- 33 463 14. Hoyert DL. Maternal mortality rates in the United States, 2019. 2020.
- 34 464 15. Singh GK. Trends and social inequalities in maternal mortality in the United States,  
35 465 1969-2018. *International Journal of Maternal and Child Health and AIDS*.  
36 466 2021;10(1):29.
- 37 467 16. Cook JL, Majd M, Blake J, et al. Measuring Maternal Mortality and Morbidity in  
38 468 Canada. *J Obstet Gynaecol Can*. 2017;39(11):1028-1037.
- 39 469 17. Gauld R, Burgers J, Dobrow M, et al. Healthcare system performance improvement: a  
40 470 comparison of key policies in seven high-income countries. *Journal of health*  
41 471 *organization and management*. 2014.
- 42 472 18. Lee SE, Scott LD, Dahinten VS, Vincent C, Lopez KD, Park CG. Safety culture,  
43 473 patient safety, and quality of care outcomes: a literature review. *Western journal of*  
44 474 *nursing research*. 2019;41(2):279-304.
- 45 475 19. Kruk ME, Gage AD, Arsenaault C, et al. High-quality health systems in the  
46 476 Sustainable Development Goals era: time for a revolution. *The Lancet global health*.  
47 477 2018;6(11):e1196-e1252.
- 48 478 20. Baker A. *Crossing the quality chasm: a new health system for the 21st century*. Vol  
49 479 323: British Medical Journal Publishing Group; 2001.
- 50 480 21. Wolfe A. Institute of Medicine report: crossing the quality chasm: a new health care  
51 481 system for the 21st century. *Policy, Politics, & Nursing Practice*. 2001;2(3):233-235.

- 1  
2  
3 482 22. National Academies of Sciences E, Medicine. Crossing the global quality chasm:  
4 483 Improving health care worldwide. 2018.  
5 484 23. Organization WH. Framework on integrated, people-centred health services. *Geneva:*  
6 485 *World Health Organization*. 2016:2019.  
7 486 24. Organization WH. WHO report on cancer: setting priorities, investing wisely and  
8 487 providing care for all. 2020.  
9 488 25. Bergin RJ, Whitfield K, White V, et al. Optimal care pathways: A national policy to  
10 489 improve quality of cancer care and address inequalities in cancer outcomes. *Journal*  
11 490 *of cancer policy*. 2020;25:100245.  
12 491 26. Allen D, Gillen E, Rixson L. Systematic review of the effectiveness of integrated care  
13 492 pathways: what works, for whom, in which circumstances? *International Journal of*  
14 493 *Evidence-Based Healthcare*. 2009;7(2):61-74.  
15 494 27. Lodewijckx C, Sermeus W, Panella M, et al. Impact of care pathways for in-hospital  
16 495 management of COPD exacerbation: a systematic review. *International journal of*  
17 496 *nursing studies*. 2011;48(11):1445-1456.  
18 497 28. Alkandari M, Ryan K, Hollywood A. The experiences of people living with  
19 498 peripheral neuropathy in Kuwait—a process map of the patient journey. *Pharmacy*.  
20 499 2019;7(3):127.  
21 500 29. Ferreira AS, Oliveira GR. Business process modeling: A webibliomining perspective  
22 501 of architecture frameworks. *Independent Journal of Management & Production*.  
23 502 2019;10(3):1159-1183.  
24 503 30. Ramudhin A, Bulgak AA, Fowler JG. A business process improvement study in a  
25 504 specialized North American hospital. Paper presented at: PICMET 2010  
26 505 TECHNOLOGY MANAGEMENT FOR GLOBAL ECONOMIC GROWTH2010.  
27 506 31. Ramudhin A, Chan E, Mokadem A. A framework for the modelling, analysis and  
28 507 optimization of pathways in healthcare. Paper presented at: 2006 International  
29 508 Conference on Service Systems and Service Management2006.  
30 509 32. Ramudhin A, Chan E, Benziane R, Mokadem A. Modeling and optimization of health  
31 510 care processes. Paper presented at: IIE Annual Conference. Proceedings2006.  
32 511 33. Loya SR, Kawamoto K, Chatwin C, Huser V. Service oriented architecture for  
33 512 clinical decision support: A systematic review and future directions. *Journal of*  
34 513 *medical systems*. 2014;38(12):1-22.  
35 514 34. Mincarone P, Leo CG, Trujillo-Martín MdM, et al. Standardized languages and  
36 515 notations for graphical modelling of patient care processes: a systematic review.  
37 516 *International Journal for Quality in Health Care*. 2018;30(3):169-177.  
38 517 35. De Ramon Fernandez A, Ruiz Fernandez D, Sabuco Garcia Y. Business Process  
39 518 Management for optimizing clinical processes: A systematic literature review. *Health*  
40 519 *informatics journal*. 2020;26(2):1305-1320.  
41 520 36. Zarour K, Benmerzoug D, Guermouche N, Drira K. A systematic literature review on  
42 521 BPMN extensions. *Business Process Management Journal*. 2019.  
43 522 37. Arksey H, O'Malley L. Scoping studies: towards a methodological framework.  
44 523 *International journal of social research methodology*. 2005;8(1):19-32.  
45 524 38. Levac D, Colquhoun H, O'Brien KK. Scoping studies: advancing the methodology.  
46 525 *Implementation science*. 2010;5(1):1-9.  
47 526 39. Tricco AC, Lillie E, Zarin W, et al. A scoping review on the conduct and reporting of  
48 527 scoping reviews. *BMC medical research methodology*. 2016;16(1):1-10.  
49 528 40. Peters MD, Godfrey C, McInerney P, Munn Z, Tricco AC, Khalil H. Chapter 11:  
50 529 scoping reviews (2020 version). *JBIM manual for evidence synthesis, JBI*. 2020;2020.



- 1  
2  
3 530 41. Tricco AC, Lillie E, Zarin W, et al. PRISMA extension for scoping reviews  
4 531 (PRISMA-ScR): checklist and explanation. *Annals of internal medicine*.  
5 532 2018;169(7):467-473.
- 6 533 42. Abasse KS, Gartner J-B, Labbé L, et al. Benefits and Limitations of Business Process  
7 534 Model Notation in Modeling Patient Healthcare Trajectory: A Scoping Review  
8 535 Protocol. 2021.
- 9 536 43. Ponsignon F, Smart A, Phillips L. A customer journey perspective on service delivery  
10 537 system design: insights from healthcare. *International Journal of Quality &*  
11 538 *Reliability Management*. 2018.
- 12 539 44. Alexander GL. The nurse—patient trajectory framework. *Studies in health technology*  
13 540 *and informatics*. 2007;129(Pt 2):910.
- 14 541 45. Beauséjour M, Goulet L, Feldman DE, et al. Pathways of healthcare utilisation in  
15 542 patients with suspected adolescent idiopathic scoliosis: a cross-sectional study. *BMC*  
16 543 *health services research*. 2015;15(1):1-12.
- 17 544 46. Louis CJ, Clark JR, Gray B, Brannon D, Parker V. Service line structure and  
18 545 decision-maker attention in three health systems: Implications for patient-centered  
19 546 care. *Health care management review*. 2019;44(1):41-56.
- 20 547 47. Yang H, Li W, Liu K, Zhang J. Knowledge-based clinical pathway for medical  
21 548 quality improvement. *Information systems frontiers*. 2012;14(1):105-117.
- 22 549 48. De Bleser L, Depreitere R, WAELE KD, Vanhaecht K, Vlayen J, Sermeus W.  
23 550 Defining pathways. *Journal of nursing management*. 2006;14(7):553-563.
- 24 551 49. Aziz AFA, Nordin NAM, Ali MF, Abd Aziz NA, Sulong S, Aljunid SM. The  
25 552 integrated care pathway for post stroke patients (iCaPPS): a shared care approach  
26 553 between stakeholders in areas with limited access to specialist stroke care services.  
27 554 *BMC health services research*. 2017;17(1):1-11.
- 28 555 50. Busari JO, Yaldiz H, Gans RO, Duits AJ. Clinical Leadership as an Agent for  
29 556 Change: A Health System Improvement Intervention in Curaçao. *Journal of*  
30 557 *multidisciplinary healthcare*. 2020;13:787.
- 31 558 51. Seguin ML, Rangnekar A, Renedo A, Palafox B, McKee M, Balabanova D.  
32 559 Systematic review of frameworks used to conceptualise health pathways of  
33 560 individuals diagnosed with cardiovascular diseases. *BMJ global health*.  
34 561 2020;5(9):e002464.
- 35 562 52. Valentijn PP, Biermann C, Bruijnzeels MA. Value-based integrated (renal) care:  
36 563 setting a development agenda for research and implementation strategies. *BMC health*  
37 564 *services research*. 2016;16(1):1-11.
- 38 565 53. Elkhuzen SG, Vissers JM, Mahdavi M, Van De Klundert JJ. Modeling Patient  
39 566 Journeys for Demand Segments in Chronic Care, With an Illustration to Type 2  
40 567 Diabetes. *Frontiers in Public Health*. 2020;8.
- 41 568 54. Fung-Kee-Fung M, Maziak D, Pantarotto J, et al. Regional process redesign of lung  
42 569 cancer care: a learning health system pilot project. *Current Oncology*. 2018;25(1):59-  
43 570 66.
- 44 571 55. Mohr P, Galderisi S, Boyer P, et al. Value of schizophrenia treatment I: The patient  
45 572 journey. *European Psychiatry*. 2018;53:107-115.
- 46 573 56. Combi C, Oliboni B, Zardiniy A, Zerbato F. Seamless design of decision-intensive  
47 574 care pathways. Paper presented at: 2016 IEEE International Conference on Healthcare  
48 575 Informatics (ICHI)2016.
- 49 576 57. Cánovas-Segura B, Zerbato F, Oliboni B, et al. A process-oriented approach for  
50 577 supporting clinical decisions for infection management. Paper presented at: 2017  
51 578 IEEE International Conference on Healthcare Informatics (ICHI)2017.
- 52  
53  
54  
55  
56  
57  
58  
59  
60

- 1  
2  
3 579 58. Hewelt M, Kunde A, Weske M, Meinel C. Recommendations for medical treatment  
4 580 processes: the PIGS approach. Paper presented at: International Conference on  
5 581 Business Process Management2014.  
6 582 59. de Bruin JS, Adlassnig K-P, Leitich H, Rappelsberger A. Separating business logic  
7 583 from medical knowledge in digital clinical workflows using business process model  
8 584 and notation and arden syntax. In: *Health Informatics Meets eHealth*. IOS Press;  
9 585 2018:17-24.  
10 586 60. Wohlin C. Guidelines for snowballing in systematic literature studies and a replication  
11 587 in software engineering. Paper presented at: Proceedings of the 18th international  
12 588 conference on evaluation and assessment in software engineering2014.  
13 589 61. Tomaskova H, Kopecky M. Specialization of Business Process Model and Notation  
14 590 Applications in Medicine—A Review. *Data*. 2020;5(4):99.  
15 591 62. Babineau J. Product review: covidence (systematic review software). *Journal of the*  
16 592 *Canadian Health Libraries Association/Journal de l'Association des bibliothèques de*  
17 593 *la santé du Canada*. 2014;35(2):68-71.  
18 594 63. Kellermeyer L, Harnke B, Knight S. Covidence and Rayyan. *Journal of the Medical*  
19 595 *Library Association: JMLA*. 2018;106(4):580.  
20 596 64. McHugh ML. Interrater reliability: the kappa statistic. *Biochemia medica*.  
21 597 2012;22(3):276-282.  
22 598  
23  
24  
25  
26  
27  
28  
29  
30  
31  
32  
33  
34  
35  
36  
37  
38  
39  
40  
41  
42  
43  
44  
45  
46  
47  
48  
49  
50  
51  
52  
53  
54  
55  
56  
57  
58  
59  
60

## Supplementary materials – Databases search strategy

### Medline (Ovid)

Date of the search: 09-12-2021

Database limit: No database limit has been applied

| # | Search strategy                                                                                                                                                                                                                                                                                      | Results |
|---|------------------------------------------------------------------------------------------------------------------------------------------------------------------------------------------------------------------------------------------------------------------------------------------------------|---------|
| 1 | ("Business Process*" adj1 (Model* OR Method? OR management)).ti,ab,kw,kf OR "Decision Model* notation".ti,ab,kw,kf OR BPMN*.ti,ab,kw,kf OR BPM.ti,kw,kf                                                                                                                                              | 285     |
| 2 | Critical Pathways/ OR Practice Guidelines as Topic/ OR Workflow/ OR Clinical Decision-Making/ OR Decision Support Systems, Clinical/ OR Patient Care Management/                                                                                                                                     | 163743  |
| 3 | (Decision adj1 (making OR support)).ti,ab,kw OR ((clinical OR medical OR healthcare OR "health care") adj2 process*).ti,ab,kw OR ((healthcare OR clinical OR critical OR care) adj2 path*).ti,ab,kw OR guideline*.ti,ab,kw OR Workflow*.ti,ab,kw OR careflow*.ti,ab,kw OR "patient journey".ti,ab,kw | 686144  |
| 4 | 2 or 3                                                                                                                                                                                                                                                                                               | 769504  |
| 5 | 1 and 4                                                                                                                                                                                                                                                                                              | 99      |
| 6 | limit 5 to ed=20040101-20211209                                                                                                                                                                                                                                                                      | 85      |

### Embase (Embase.com)

Date of the search: 09-12-2021

Database limit: No database limit has been applied

| # | Search strategy                                                                                                                                                                                                                                                                                                                                                  | Results   |
|---|------------------------------------------------------------------------------------------------------------------------------------------------------------------------------------------------------------------------------------------------------------------------------------------------------------------------------------------------------------------|-----------|
| 1 | ("Business Process*" NEAR/1 (Model* OR Method\$ OR management)):ti,ab,kw OR "Decision Model* notation":ti,ab,kw OR BPMN*:ti,ab,kw OR BPM:ti,kw                                                                                                                                                                                                                   | 368       |
| 2 | 'practice guideline'/de OR 'clinical pathway'/de OR 'clinical protocol'/de OR 'workflow'/de OR 'decision support system'/exp OR 'clinical decision making'/de                                                                                                                                                                                                    | 681,799   |
| 3 | (Decision NEAR/1 (making OR support)):ti,ab,kw OR ((clinical OR medical OR healthcare OR "health care" OR "Patient care") NEAR/2 process*).ti,ab,kw OR ((healthcare OR clinical OR critical OR care) NEAR/2 path*).ti,ab,kw OR guideline*:ti,ab,kw OR Workflow*:ti,ab,kw OR careflow*:ti,ab,kw OR "patient journey":ti,ab,kw OR "Healthcare trajectory":ti,ab,kw | 1,040,782 |
| 4 | #2 OR #3                                                                                                                                                                                                                                                                                                                                                         | 1,381,760 |
| 5 | #1 AND #4                                                                                                                                                                                                                                                                                                                                                        | 117       |
| 6 | #5 AND [01-01-2004]/sd                                                                                                                                                                                                                                                                                                                                           | 112       |

### Academic Search Premier

Date of the search: 09-12-2021

Database limit: No database limit has been applied

| # | Search strategy                                                                                                                                                                                                                                                                                                                                                                           | Results |
|---|-------------------------------------------------------------------------------------------------------------------------------------------------------------------------------------------------------------------------------------------------------------------------------------------------------------------------------------------------------------------------------------------|---------|
| 1 | TI ("Business Process*" N1 (Model* OR Method# OR management)) OR TI "Decision Model* notation" OR TI BPMN* OR TI BPM OR AB ("Business Process*" N1 (Model* OR Method# OR management)) OR AB "Decision Model* notation" OR AB BPMN* OR KW ("Business Process*" N1 (Model* OR Method# OR management)) OR KW "Decision Model* notation" OR KW BPMN* OR KW BPM                                | 2,229   |
| 2 | DE GUIDELINES OR DE "DECISION support systems" OR DE "DECISION making" OR DE "MEDICAL protocols" OR DE "WORKFLOW" OR DE "PATIENT management"                                                                                                                                                                                                                                              | 180,673 |
| 3 | TI (Decision N1 (making OR support)) OR TI ((clinical OR medical OR healthcare OR "health care" OR "Patient care") N2 process*) OR TI ((healthcare OR clinical OR critical OR care) N2 path*) OR TI guideline* OR TI Workflow* OR TI careflow* OR TI "patient journey" OR TI "Healthcare trajectory" OR AB (Decision N1 (making OR support)) OR AB ((clinical OR medical OR healthcare OR | 596,181 |

|   |                                                                                                                                                                                                                                                                                                                                                                                                                                                                                                                            |         |
|---|----------------------------------------------------------------------------------------------------------------------------------------------------------------------------------------------------------------------------------------------------------------------------------------------------------------------------------------------------------------------------------------------------------------------------------------------------------------------------------------------------------------------------|---------|
|   | "health care" OR "PaABent care") N2 process*) OR AB ((healthcare OR clinical OR criABcal OR care) N2 path*) OR AB guideline* OR AB Workflow* OR AB careflow* OR AB "paABent journey" OR AB "Healthcare trajectory" OR KW (Decision N1 (making OR support)) OR KW ((clinical OR medical OR healthcare OR "health care" OR "PaKwent care") N2 process*) OR KW ((healthcare OR clinical OR criKWcal OR care) N2 path*) OR KW guideline* OR KW Workflow* OR KW careflow* OR KW "paKwent journey" OR KW "Healthcare trajectory" |         |
| 4 | S2 OR S3                                                                                                                                                                                                                                                                                                                                                                                                                                                                                                                   | 664,934 |
| 5 | S1 AND S4                                                                                                                                                                                                                                                                                                                                                                                                                                                                                                                  | 390     |
| 6 | S5 AND DT 20040101-20211209                                                                                                                                                                                                                                                                                                                                                                                                                                                                                                | 359     |

### ABI/Inform (ProQuest)

Date of the search: 09-12-2021

Database limit: peer review publications only limit has been applied

| # | Search strategy                                                                                                                                                                                                                                                                                                                            | Results |
|---|--------------------------------------------------------------------------------------------------------------------------------------------------------------------------------------------------------------------------------------------------------------------------------------------------------------------------------------------|---------|
| 1 | TI,AB(("Business Process*" NEAR/1 (Model* OR Method? OR management)) OR "Decision Model* notation" OR BPMN*) OR TI(BPM)                                                                                                                                                                                                                    | 3 110   |
| 2 | SU("Patient care planning") OR SU("Guidelines") OR SU("Decision support systems") OR SU("Decision making")                                                                                                                                                                                                                                 | 305 337 |
| 3 | TI,AB(Decision NEAR/1 (making OR support)) OR TI,AB((clinical OR medical OR healthcare OR "health care" OR "Patient care") NEAR/2 process*) OR TI,AB((healthcare OR clinical OR critical OR care) NEAR/2 path*) OR TI,AB(guideline*) OR TI,AB(Workflow*) OR TI,AB(careflow*) OR TI,AB("patient journey") OR TI,AB("Healthcare trajectory") | 229 017 |
| 4 | 2 OR 3                                                                                                                                                                                                                                                                                                                                     | 447 323 |
| 5 | 1 AND 4                                                                                                                                                                                                                                                                                                                                    | 668     |
| 6 | 5 AND YR(2004-2021)                                                                                                                                                                                                                                                                                                                        | 553     |
| 7 | Peer review publications only limit                                                                                                                                                                                                                                                                                                        | 311     |

### Web of Science

Date of the search: 09-12-2021

Database limit: publications between 01-01-2004 to 09-12-2021 limit has been applied

| # | Search strategy                                                                                                                                                                                                                                                                                                    | Results |
|---|--------------------------------------------------------------------------------------------------------------------------------------------------------------------------------------------------------------------------------------------------------------------------------------------------------------------|---------|
| 1 | TS=("Business Process*" NEAR/1 (Model* OR Method\$ OR management)) OR TS="Decision Model* notation" OR TS=BPMN* OR TI=BPM OR KP=BPM OR AK=BPM                                                                                                                                                                      | 9,832   |
| 2 | TS=("patient decision" NEAR/1 (making OR support)) OR TS=((clinical OR medical OR healthcare OR "health care" OR "Patient care") NEAR/2 process*) OR TS=((healthcare OR clinical OR critical OR care) NEAR/2 path*) OR TS=(guideline*) OR TS=(careflow*) OR TS=("patient journey") OR TS=("Healthcare trajectory") | 692,475 |
| 3 | #1 AND #2                                                                                                                                                                                                                                                                                                          | 475     |

### Google Scholar (<https://harzing.com/resources/publish-or-perish>)

Date of the search: 09-12-2021

Database limit: only up to the 20 first results per string have been considered; publications between 2004 and 2021 limit has been applied; citations and patents options have been removed

| # | Search                                                                                                          | # Results screened |
|---|-----------------------------------------------------------------------------------------------------------------|--------------------|
| 1 | ("Business Process Model" OR "Business Process Modelling" OR "Business Process Modeling") AND "patient journey" | 20                 |

|    |    |                                                                                                                                                        |            |
|----|----|--------------------------------------------------------------------------------------------------------------------------------------------------------|------------|
| 1  | 2  | ("Business Process Model" OR "Business Process Modelling" OR "Business Process Modeling" OR "Business Process management") AND "clinical pathways"     | 20         |
| 2  | 3  | ("Business Process Model" OR "Business Process Modelling" OR "Business Process Modeling" OR "Business Process management") AND "critical pathways"     | 20         |
| 3  | 4  | ("Business Process Model" OR "Business Process Modelling" OR "Business Process Modeling" OR "Business Process management") AND "healthcare pathways"   | 20         |
| 4  | 5  | ("Business Process Model" OR "Business Process Modelling" OR "Business Process Modeling" OR "Business Process management") AND "clinical process"      | 20         |
| 5  | 6  | ("Business Process Model" OR "Business Process Modelling" OR "Business Process Modeling" OR "Business Process management") AND "medical process"       | 20         |
| 6  | 7  | ("Business Process Model" OR "Business Process Modelling" OR "Business Process Modeling" OR "Business Process management") AND "healthcare process"    | 20         |
| 7  | 8  | ("Business Process Model" OR "Business Process Modelling" OR "Business Process Modeling" OR "Business Process management") AND "health care process"   | 20         |
| 8  | 9  | ("Business Process Model" OR "Business Process Modelling" OR "Business Process Modeling" OR "Business Process management") AND guideline               | 20         |
| 9  | 10 | ("Business Process Model" OR "Business Process Modelling" OR "Business Process Modeling" OR "Business Process management") AND guidelines              | 20         |
| 10 | 11 | ("Business Process Model" OR "Business Process Modelling" OR "Business Process Modeling" OR "Business Process management") AND "decision support"      | 20         |
| 11 | 12 | ("Business Process Model" OR "Business Process Modelling" OR "Business Process Modeling" OR "Business Process management") AND "Healthcare trajectory" | 1          |
| 12 |    | <b>Total number of results</b>                                                                                                                         | <b>221</b> |



# BMJ Open

## Benefits and Limitations of Business Process Model Notation in Modelling Patient Healthcare Trajectory: A Scoping Review Protocol

|                                 |                                                                                                                                                                                                                                                                                                                                                                                                                                                                                                                                                                                                |
|---------------------------------|------------------------------------------------------------------------------------------------------------------------------------------------------------------------------------------------------------------------------------------------------------------------------------------------------------------------------------------------------------------------------------------------------------------------------------------------------------------------------------------------------------------------------------------------------------------------------------------------|
| Journal:                        | <i>BMJ Open</i>                                                                                                                                                                                                                                                                                                                                                                                                                                                                                                                                                                                |
| Manuscript ID                   | bmjopen-2021-060357.R2                                                                                                                                                                                                                                                                                                                                                                                                                                                                                                                                                                         |
| Article Type:                   | Protocol                                                                                                                                                                                                                                                                                                                                                                                                                                                                                                                                                                                       |
| Date Submitted by the Author:   | 22-Apr-2022                                                                                                                                                                                                                                                                                                                                                                                                                                                                                                                                                                                    |
| Complete List of Authors:       | Kassim, Said; Universite Laval; Laval University Department of Management,<br>Gartner, Jean-Baptiste; Université Laval, Département de management<br>Labbé, Laurence; Laval University, Management<br>Landa, Paolo; Laval University, Operations and Decision Systems<br>Department; Centre de recherche du CHU de Québec, Université Laval<br>Paquet, Catherine; Université Laval Département de management<br>Bergeron, Frédéric; Université Laval<br>Lemaire, Célia; EM Strasbourg Business School<br>Côté, André; Universite Laval Departement de management,<br>Département de management |
| <b>Primary Subject Heading</b>: | Health informatics                                                                                                                                                                                                                                                                                                                                                                                                                                                                                                                                                                             |
| Secondary Subject Heading:      | Medical management, Health services research                                                                                                                                                                                                                                                                                                                                                                                                                                                                                                                                                   |
| Keywords:                       | Quality in health care < HEALTH SERVICES ADMINISTRATION & MANAGEMENT, Health informatics < BIOTECHNOLOGY & BIOINFORMATICS, Organisation of health services < HEALTH SERVICES ADMINISTRATION & MANAGEMENT, Protocols & guidelines < HEALTH SERVICES ADMINISTRATION & MANAGEMENT                                                                                                                                                                                                                                                                                                                 |
|                                 |                                                                                                                                                                                                                                                                                                                                                                                                                                                                                                                                                                                                |

SCHOLARONE™  
Manuscripts



# 1 Benefits and Limitations of Business Process Model Notation in Modelling

## 2 Patient Healthcare Trajectory: A Scoping Review Protocol

### 3 Running title: Modelling Patient Healthcare Trajectory using BPMN

4 Kassim Said Abasse<sup>1,2,3,4,5</sup>, Jean-Baptiste Gartner<sup>1,2,3,5</sup>, Laurence Labbé<sup>1,2</sup>, Paolo Landa<sup>3,6\*</sup>,  
5 Catherine Paquet<sup>3,8,9</sup>, Frédéric Bergeron<sup>10</sup>, Célia Lemaire<sup>11</sup>, André Côté<sup>1,2,3,4,5</sup>.

6 <sup>1</sup>Département de management, Faculté des sciences de l'administration, Université Laval,  
7 Québec, G1V 0A6, Canada.

8 <sup>2</sup>Centre de recherche en gestion des services de santé, Université Laval, Québec, G1V 0A6,  
9 Canada.

10 <sup>3</sup>Centre de recherche du CHU de Québec, Université Laval, Québec, G1V 0A6, Canada

11 <sup>4</sup>VITAM, Centre de recherche en santé durable, Université Laval, Québec, G1V 0A6, Canada.

12 <sup>5</sup>Centre de recherche du CISSS de Chaudière-Appalaches, Québec, G1V 0A6, Canada.

13 <sup>6</sup>Département d'opérations et systèmes de décision, Faculté des sciences de l'administration  
14 Université Laval, Québec, G1K 7P4, Canada

15 <sup>8</sup>Département de marketing, Faculté des sciences de l'administration, Université Laval,  
16 Québec, G1V 0A6, Canada.

17 <sup>9</sup>Centre NUTRISS-Nutrition, Santé et société Université Laval, Québec, G1V 0A6, Canada.

18 <sup>10</sup>Bibliothèque, Direction des services-conseils, Université Laval, Québec, G1V 0A6, Canada

19 <sup>11</sup>Université de Strasbourg, EM Strasbourg-Business School, HuManiS, Strasbourg, France.

#### 20 \*Corresponding Author

21 Paolo Landa, Ph.D

22 Professeur Adjoint

23 Département d'opérations et systèmes de décision

24 Faculté des sciences de l'administration

25 Université Laval, Québec, QC, G1V 0A6, Canada

26 Local 2421, Tel :(+1)418-656-2131 (Ext. 413389)

27 Email: [Paolo.Landa@fsa.ulaval.ca](mailto:Paolo.Landa@fsa.ulaval.ca).

## 46 **Abstract**

47 **Introduction:** The adoption of business process model notation (BPMN) in modelling  
48 healthcare trajectory can enhance the efficiency and efficacy of healthcare organizations,  
49 improve patient outcomes while restraining costs. Existing systematic reviews have been  
50 inconclusive regarding the effectiveness of BPMN in modelling healthcare trajectory. The aims  
51 of this scoping review are to map and aggregate existing evidence on the benefits and  
52 limitations associated with BPMN in healthcare trajectory, highlighting areas of improvement  
53 on BPMN and its extensions in healthcare. We will assess BPMN's ability to model key  
54 dimensions or concepts of the healthcare process and to meet the needs of stakeholders. The  
55 review will highlight the advantages of this approach to support clinical activities and decision-  
56 making processes associated with the healthcare trajectory, proposing a conceptual framework  
57 for improving the use of BPMN in healthcare.

58 **Methods and Analysis:** This study will be performed in accordance with the methodological  
59 framework suggested by Arksey and O'Malley. A wide range of electronic databases and grey  
60 literature sources will be systematically searched using predefined keywords. The review will  
61 include any study design focusing on the application of the BPMN approach for optimising  
62 healthcare trajectories, published in either English or French from January 1<sup>st</sup>, 2004 to  
63 December 9<sup>th</sup>, 2021. Two reviewers will independently screen titles, abstracts, and full-text  
64 articles and select articles meeting the inclusion criteria. A customised data extraction form  
65 will be used to extract data. The results will be presented using descriptive statistics and  
66 thematic analysis on qualitative data.

67 **Ethics and dissemination:** Research ethics approval is not required. Review findings will be  
68 used to advance understanding about BPMN, its extensions and application in healthcare  
69 trajectory optimisation. The review will develop recommendations on tailoring BPMN  
70 strategies for optimising care pathways and decision-making processes. Findings will be  
71 disseminated in peer-reviewed journals, conferences and discussions with relevant  
72 organizations and stakeholders.

73 **Keywords:** Healthcare trajectory, healthcare management, business process modelling  
74 notation, healthcare processes, care pathways, scoping review

75

76

77

78

79

**Strengths and limitations of this study**

- ❖ Stakeholders will be consulted and engaged throughout the study review process.
- ❖ Our scoping review will conform to the rigorous methodology indicated by Arksey and O'Malley, and improved by Levac et al. and further refined by the Joanna Briggs Institute (JBI)
- ❖ Both peer-reviewed and grey literature will be considered to ensure a comprehensive coverage.
- ❖ The search strategy in electronic databases considered articles published between January 2004 and December 2021, while abstracts and full-texts selection will be limited to French and English language.
- ❖ The quality appraisal of publications captured will not be assessed, as it is beyond the aim of a scoping review.

114

## 115 INTRODUCTION

116 With the continuous challenges facing healthcare organizations in the past few years<sup>1-3</sup>, many  
117 strategies have focused on process improvements with the objective of enhancing efficiency  
118 and efficacy to improve patient outcomes while controlling costs<sup>4,5</sup>. Through the years, health  
119 expenditure and financing have increased substantially in developed countries such as the  
120 United States (US) and Canada<sup>6-9</sup>. In 2019, Canada spent 10.8% of its gross domestic product  
121 on healthcare expenses according to the Organization for Economic Cooperation and  
122 Development (OECD, 2021)<sup>9</sup>. This ratio reached 17.7% at the same time in the US, where the  
123 national health spending is projected to reach \$6.2 trillion by 2028, growing at an average  
124 annual rate of 5.4%<sup>8,9</sup>. However, compared with other OECD countries, the US perform poorly  
125 on process, outcome, and patient experience metrics, as well as life expectancy<sup>10,11</sup>. Life  
126 expectancy in the US was the lowest at 78.8 years compared with a range from 80.7 to 83.9  
127 years for other OECD countries<sup>10</sup>. The infant mortality rate in the US was 5.8 per 1000 live  
128 births and the maternal mortality rate was 17.4 per 100 000 births in 2018, both higher than the  
129 mean rates for any OECD country<sup>11-15</sup>. Canada is another developed country performing poorly  
130 in terms of infant and maternal mortality, with 4.7 fatalities out of every 1,000 live births and  
131 10.2 maternal deaths per 100 000 births<sup>11,16</sup>.

132 The lack of control in processes used to deliver medical care is clearly a major problem in the  
133 context of preventable medical errors with lethal damages and high economic costs in many  
134 hospitals<sup>17-19</sup>. Since the released Crossing the Quality Chasm<sup>20,21</sup> by the Institute of Medicine  
135 (US), numerous national and international organizations including the Academies of  
136 Sciences<sup>22</sup> and the World Health Organization<sup>23,24</sup> have made repeated calls to develop a  
137 framework for advancing the quality of care, ensuring that care is safe, effective, efficient,  
138 patient-centred, timely, and equitable<sup>20</sup>. To do this, healthcare organizations and systems must  
139 develop solutions that enhance both efficiency and efficacy of improving healthcare  
140 organization and patient outcomes while restraining costs. Efforts to improve clinical and care  
141 pathways have shown such benefits<sup>25-27</sup>. Over the last decades, articles have revealed that  
142 mapping healthcare trajectories allowed to decrease the variation of professional practices and  
143 to standardise care processes<sup>17-19</sup>. This practice has many benefits such as improving the  
144 accessibility, fluidity, quality, performance, and sustainability of healthcare services<sup>25,28</sup>.

145 In this context, several tools have been developed to support process improvement through  
146 process mapping. Among these methods, business process modelling notation (BPMN) is an  
147 approach that consists of representing processes as a network of activities and tasks<sup>29-31</sup>. This

1  
2  
3 148 structured approach supported by the Object Management Group since 2005 and adopted as an  
4  
5 149 international standard by the International Organization for Standardization since 2012, is in  
6  
7 150 its second version (BPMN 2.0) <sup>30-32</sup>.

8 151 In recent years, a few reviews <sup>33-36</sup> have been conducted to analyse whether the BPMN  
9  
10 152 approach can become a useful tool to improve the effectiveness and quality of healthcare  
11  
12 153 processes. For instance, Loya et al.<sup>33</sup> used a service-oriented architecture in clinical decision  
13  
14 154 support and provided evidence that BPMN was not commonly used for clinical decision  
15  
16 155 support systems, despite being the preferred standard for business process modelling in  
17  
18 156 healthcare. Mincarone et al.<sup>34</sup> demonstrated that BPMN provides a good level of formalisation,  
19  
20 157 a standardised communication framework between multiple stakeholders, good user  
21  
22 158 comprehensibility, and easier interprofessional analyses. Fernández et al.<sup>35</sup> suggested that  
23  
24 159 BPMN is useful for standardising processes that have some variability due to its possibility to  
25  
26 160 incorporate variations or changes. Moreover, Zarour et al.<sup>36</sup> analysed various BPMN  
27  
28 161 extensions (e.g., decision modelling notation) that can be used to improve its efficiency in many  
29  
30 162 domains, showing that healthcare was among the most targeted area. The overall conclusion of  
31  
32 163 these reviews <sup>33-36</sup> is that BPMN seems to be increasingly used in healthcare organizations to  
33  
34 164 the point of becoming a standard in process improvement methods. However, these articles<sup>33-  
35  
36 165 <sup>36</sup> acknowledged the difficulties and challenges when implementing BPMN in the health sector.  
37  
38 166 Indeed, a limitation of these articles<sup>33-36</sup> is that none of them put the use of BPMN to improve  
39  
40 167 healthcare trajectories or patient care trajectory as its primary focus. Loya et al.<sup>33</sup> focused on  
41  
42 168 the use of BPMN for supporting clinical decisions and stated that BPMN has potential to  
43  
44 169 optimise clinical pathways, but they did not assess this possibility. The papers of Mincarone et  
45  
46 170 al.<sup>34</sup> and Fernández et al.<sup>35</sup> mainly focused on clinical processes, briefly addressing healthcare  
47  
48 171 trajectories, resulting in a shallow analysis on this subject. Finally, Zarour et al.<sup>36</sup> targeted many  
49  
50 172 BPMN extensions that could improve its effectiveness, but their research was not exclusive to  
51  
52 173 healthcare setting.</sup>

53  
54 174 Our literature review builds on these previous reviews<sup>33-36</sup> by providing an in-depth analysis  
55  
56 175 of the ability of BPMN to effectively improve the quality of clinical practices, the security, and  
57  
58 176 the fluidity of the care process and to propose tangible results on the patient experience in a  
59  
60 177 patient-centred care and services logic. Moreover, we will analyse the opportunities and  
61  
62 178 limitations related to the integration of BPMN extension.

63  
64 179 Considering the above gaps in the literature, the primary aim of this scoping review is to  
65  
66 180 identify and map existing evidence on the main benefits and limitations associated with the use  
67  
68 181 of BPMN in healthcare trajectory modelling. To do so, we will assess its ability to model key

1  
2  
3 182 dimensions or concepts of the healthcare process and to meet the needs of stakeholders. The  
4  
5 183 review will also highlight the capacity of the BPMN approach and its extensions to support  
6  
7 184 clinical activities and decision-making processes associated with the healthcare trajectory and  
8  
9 185 propose a conceptual framework for improving the use of BPMN in healthcare practices.

## 10 186 **METHODS AND ANALYSIS**

11  
12 187 We chose to undertake a scoping review as the best method to map the available evidence  
13  
14 188 regarding the benefits and limitations of BPMN in modelling patient healthcare trajectory<sup>37-39</sup>.  
15  
16 189 The present review will be conducted following the methodological frameworks described by  
17  
18 190 Arksey and O'Malley<sup>37</sup>, and improved by Levac et al.<sup>38</sup>, and further refined by the Joanna  
19  
20 191 Briggs Institute (JBI)<sup>40</sup>. The standardized methodology included six stages for scoping review:  
21  
22 192 (1) Identifying the research question, (2) Identifying relevant articles and grey literature, (3)  
23  
24 193 Selecting articles, (4) Charting the data, (5) Collating, summarizing, and reporting the data,  
25  
26 194 and (6) Consulting with relevant stakeholders, thereby enabling knowledge translation. The  
27  
28 195 Preferred Reporting Items for Systematic Reviews and Meta-Analysis Extension for Scoping  
29  
30 196 Reviews (PRISMA-ScR)<sup>39,41</sup> has also been used to guide the reporting of this protocol and will  
31  
32 197 also subsequently be used to structure the reporting of the full review. Furthermore, we will  
33  
34 198 take an iterative and reflexive approach throughout the review process, particularly to refine  
35  
36 199 our study selection and data extraction steps to the best target meeting our objective. This  
37  
38 200 protocol is registered through the Open Science Framework<sup>42</sup>. The development of the scoping  
39  
40 201 review will start in May 2022 and it should be finalised in September 2022.

### 41 202 **Stage 1: Identifying the Research Question**

42  
43 203 As the focus of scoping reviews is on summarizing the breadth of evidence, the research  
44  
45 204 questions should be broad while keeping in mind the review's main purpose<sup>37,38,40,41</sup>. Thus, we  
46  
47 205 started with, "What is known about the application of BPMN methodology in healthcare  
48  
49 206 organization?" A preliminary search was conducted through some electronic databases  
50  
51 207 including International Prospective Register of Systematic Reviews, JBI Database of  
52  
53 208 Systematic Reviews and Implementation Reports, Cochrane Database of Systematic Reviews,  
54  
55 209 and National Center for Biotechnology Information, which revealed three systematic reviews  
56  
57 210 of modelling healthcare processes using the BPMN methodology<sup>33-36</sup>. Although findings from  
58  
59 211 these reviews<sup>33-36</sup> supported the use of BPMN as an effective methodology to optimise  
60  
212 healthcare processes, no conclusions on the effectiveness were drawn. The reason may be that  
213 these reviews<sup>33-36</sup> were not mainly focused on the use of BPMN to improve healthcare  
214 trajectories.



1  
2  
3 215 In addition, we adopted the JBI's Population Concept and Context (PCC) framework<sup>40</sup> to  
4 216 formulate the objectives and research questions, and to conceptualise the study and report  
5 217 characteristics in terms of eligibility criteria (**Table 1**). We then consulted with experienced  
6 218 colleagues<sup>30</sup> on our predefined set of questions to provide further input and feedback.

7 219 In line with our purpose to comprehensively map the extent, range and nature of evidence  
8 220 examining the use or application of BPMN within the healthcare trajectory, we formulated four  
9 221 specific research questions to guide this review.

- 10 222 1. What are the objectives for using BPMN in healthcare organization? What are the  
11 223 expected results and what are the needs to be met?
- 12 224 2. What are the key variables, elements, concepts, and dimensions targeted by the BPMN  
13 225 approach?
- 14 226 3. Can the BPMN approach meet these expectations in healthcare trajectory? Specifically,  
15 227 a. What are the strengths (advantages) and weaknesses (limitations) of the BPMN in  
16 228 modelling healthcare trajectory?  
17 229 b. What are the effectiveness of using BPMN approach and its extensions in modelling  
18 230 healthcare trajectory?  
19 231 c. What are their opportunities and constraints in modelling healthcare processes?
- 20 232 4. What are the improvements or alternatives proposed to optimising healthcare trajectory?

21 233 For the purposes of this review, the term healthcare trajectory focuses on the patient's care  
22 234 pathway across the continuum of care. Thus, it can be the clinical pathway when it focuses on  
23 235 the organizational scale, but also the care pathway when it focuses on the systemic scale. It  
24 236 consists first of the patient's journey through the sequencing of tasks and activities at all points  
25 237 of contact<sup>43,44</sup>. It then integrates the professional actors involved in the care trajectory,<sup>45,46</sup> the  
26 238 operation management of care delivery processes<sup>47,48</sup>, the coordination structures<sup>49-51</sup>, the  
27 239 structural context of the system and organizations<sup>52,53</sup> as well as the information trajectory  
28 240 along the healthcare trajectory<sup>54,55</sup>. Thus, our understanding of the term healthcare trajectory is  
29 241 not limited to the operational aspect of the care process and to the pathophysiological process  
30 242 of a patient's disease state, but also refers to the organization of all activities surrounding  
31 243 interactions between health care workers and patients, as well as the effectiveness of patient  
32 244 care processes and their effectiveness.

33 245 Therefore, our analysis will consider not only the operational outcomes of the application  
34 246 BPMN, but also its societal impact by assessing its potential to improve patient outcomes and  
35 247 experience. In addition, healthcare process mapping includes several different flows. On one  
36 248 hand, the main process follows the patient's journey through the process steps and the decision



1  
2  
3 249 points guide the patient through the process<sup>56</sup>. On the other hand, the support processes and  
4  
5 250 secondary flows include steps directly or indirectly linked to the main process such as  
6  
7 251 administrative processes, information flow, organizational processes, and examinations that do  
8  
9 252 not require the presence of the patient (e.g., laboratory results, pathological tests). Thus, several  
10  
11 253 flows can be present and impact the care process (e.g., information flow, drug flow, blood  
12  
13 254 flow,).

14 255 Therefore, this scoping review will focus on the potential of the BPMN and all its components  
15  
16 256 to impact the results of healthcare trajectories directly or indirectly. Finally, the review will  
17  
18 257 also consider proposals for extensions to BPMN have been put forward to integrate evidence-  
19  
20 258 based medicine and guidelines to support clinical decision making, including the Decision  
21  
22 259 Modelling Notation proposed by both the Object Management Group<sup>56,57</sup> and the Computer  
23  
24 260 Interpretable Guidelines<sup>58,59</sup>.

25 261

26 262

263 **Table 1:** PCC framework<sup>40</sup> for illustrating the scope and defining inclusion and exclusion criteria of the review

|                   | Inclusion                                                                                                                                                                                                                                                                                                                                                                                                                                                                                                                                                                            | Exclusion                                                                                                                                                                                                                                                                                                                                                                                                                                         |
|-------------------|--------------------------------------------------------------------------------------------------------------------------------------------------------------------------------------------------------------------------------------------------------------------------------------------------------------------------------------------------------------------------------------------------------------------------------------------------------------------------------------------------------------------------------------------------------------------------------------|---------------------------------------------------------------------------------------------------------------------------------------------------------------------------------------------------------------------------------------------------------------------------------------------------------------------------------------------------------------------------------------------------------------------------------------------------|
| Population        | Participants of interest are the healthcare stakeholders (knowledge users) involved directly or indirectly with the use of BPMN during the healthcare trajectory or clinical process. The healthcare stakeholders (knowledge users) will include patients, healthcare professionals (e.g., nurses, physicians, other professionals), administrators and decision-makers who were involved at least once in the healthcare trajectory or clinical processes (clinical or care pathways).                                                                                              | Literature that does not apply BPMN in health trajectory (e.g., healthcare process, clinical process, process of care, patient care process, healthcare trajectory, clinical pathways, patient care management). Since we are interested in the efficacy and limitations of BPMN in healthcare trajectory, this needs to be evidence-based (analyse a case clinical pathway) and not speculative.                                                 |
| Concept           | The concept is the application of BPMN in healthcare trajectory and/or clinical processes to evaluate the capacity of BPMN to optimise healthcare performance. Articles that reported any healthcare intervention and/or clinical processes modelling with BPMN, including the improvement of the quality assessment and decision-making processes, the capacity to understand the internal clinical procedures, the ability to communicate those procedures in a standard manner, the ability to adjust to new internal challenges quickly and patients' outcomes will be included. |                                                                                                                                                                                                                                                                                                                                                                                                                                                   |
| Context           | The context for this review will consider articles conducted in any clinical setting (e.g., inpatient, outpatient) or healthcare settings (e.g., hospitals, health centres, nursing homes). Articles conducted in any part of the world are eligible to be included in this review                                                                                                                                                                                                                                                                                                   | Literature related to BPMN occurring outside of healthcare trajectory (e.g., clinical process, process of care, patient care process, patient trajectory, clinical pathways, patient care management)                                                                                                                                                                                                                                             |
| Types of evidence | Reviews (e.g., systematic, or narrative reviews), peer-reviewed research articles, full-text articles are specific to modelling patient care trajectory incorporate the use of BPMN as a methodological approach and published in either English or French.                                                                                                                                                                                                                                                                                                                          | Articles published before 2004, not written in either English or French. Editorial articles, abstracts or posters, protocols for planned articles, strategy, or guidelines. Articles where full text is unavailable. Study do not indicate the use of BPMN as a methodological approach. Study focuses on other healthcare elements, such as professional development and performance management but not specifically on patient care trajectory. |

264

## 265 **Stage 2: Identifying Relevant Articles**

266 A comprehensive search strategy was developed with the assistance of an experienced health  
267 sciences librarian (FB). The search strategy will follow the three-step approach recommended  
268 by JBI scoping review guidelines<sup>40</sup> and will target the retrieval of both published and  
269 unpublished articles from electronic searches databases, focusing to BPMN modelling of  
270 patient care trajectory. The first step of the scoping review guidelines has been completed in  
271 preparation of this protocol (**Table 1**), which involved an initial limited search on PubMed and  
272 ABI/Inform (ProQuest) databases, using the following selected keywords: "Healthcare  
273 Process" OR "Clinical Process " OR "Process of Care" OR "Clinical Pathways" OR "Patient  
274 care Process" OR "Healthcare trajectory" OR Patient Care Management" OR "Critical  
275 Pathways" OR "Clinical Healthcare Pathways" AND "Business Process Model" OR "Business  
276 Process Modelling Notation" OR "Business Process Model" OR "BPMN modelling" OR  
277 "Workflow" OR "Clinical Decision-Making" OR "Decision Support Systems" OR "Medical  
278 Process". The index words and the text words in the title and abstract of retrieved articles were  
279 analysed to identify search terms and refine the search strategy. In detail, we used an adjacency  
280 operator between the expression "Business Process" and terms (Model OR Method OR  
281 management) that seemed most relevant to us and consistent with previous published  
282 systematic literature reviews<sup>33-36</sup>, as subject experts, in order to capture all potential articles  
283 using synonyms and words variations of the "Business Process Model Notation" concept, in  
284 addition to BPMN acronym. To find articles about patient "Healthcare Trajectory", a broad  
285 concept containing several components, we used a mix of general (e.g., Practice Guidelines as  
286 Topic OR Workflow OR Clinical Decision-Making) and specific terms (e.g., Patient Care  
287 Management OR Critical Pathways), both from controlled vocabulary (e.g., MeSH terms) and  
288 keywords to avoid missing articles. We used the Boolean operator AND to restrict our search  
289 to articles specifically related to these two concepts.

290 In the second step, the search strategy will be adapted and implemented for each included  
291 information source (PubMed, Embase (Embase.com), CINAHL(EBSCO), Web of Science,  
292 ABI/Inform (ProQuest), Academic Search Premier (EBSCO), and Google Scholar) for  
293 potential eligible articles from January 1<sup>st</sup>, 2004, year when BPMN was initially developed by  
294 the Business Process Management Institute, until December 9<sup>th</sup>, 2021. In addition to the  
295 electronic database search, we will undertake a backward snowballing<sup>60</sup> search that will involve  
296 hand-searching the reference lists of the identified reviews<sup>33-36,61</sup> in order to find other relevant  
297 articles. We will also perform a hand search of some relevant journals (e.g. Institute of  
298 Electrical and Electronics Engineers, Health Informatics Journal, IOS Press - Studies in Health

1  
2  
3 299 Technology and Informatics, Journal of Digital Imaging, Lecture Notes in Artificial  
4  
5 300 Intelligence, Springer Procedia Computer Science, Recent Advances in Computer Engineering,  
6  
7 301 Information Systems Journal , European Journal of Information System, Lecture Notes in  
8  
9 302 Business Information Processing), search citations of relevant papers and scan the reference  
10  
11 303 lists of relevant papers. The final search results will be exported to the Covidence® systematic  
12  
13 304 review software<sup>62,63</sup> where duplicates will be removed. The full detailed search strategy for  
14  
15 305 peer review and grey literature sources is included in **online Supplementary Appendix I**.

### 16 306 **Stage 3: Selecting Literature for Inclusion**

17 307 All retrieved articles will undertake two levels of screening. First, two reviewers (KSA and  
18  
19 308 JBG or LL) will independently screen titles and abstracts of each article against the established  
20  
21 309 inclusion and exclusion criteria (**Table 1**). To increase the reliability of screening by the two  
22  
23 310 reviewers (KSA and JBG or LL), a pilot test will be conducted on 50 titles and abstracts to  
24  
25 311 evaluate reviewer agreement in the screening process. Discrepancies will be resolved through  
26  
27 312 discussion between the two reviewers and where agreement could not be reached, a third  
28  
29 313 reviewer (PL, CP, CL, or AC) will be consulted. Adjustments may also be made to the inclusion  
30  
31 314 criteria if necessary to ensure consistent interpretation and application of the criteria. The  
32  
33 315 researchers will discuss their selection of articles after this first round of screening, to arrive at  
34  
35 316 preliminary consensus on the list of eligible articles. In the second step, the two reviewers will  
36  
37 317 screen the full-text articles independently to determine if they meet the inclusion criteria.  
38  
39 318 Reasons for the exclusion of full-text articles will be noted in Covidence<sup>63</sup> by each reviewer.  
40  
41 319 Reviewers will again discuss their selection of articles after this second round of screening, to  
42  
43 320 arrive at a final list of eligible articles. Discrepancies will again be resolved through discussion  
44  
45 321 between the two reviewers and where agreement could not be reached, a third reviewer will be  
46  
47 322 consulted. The screening process will be documented using a PRISMA flowchart for scoping  
48  
49 323 review<sup>39,41</sup> and by calculating the inter-rater reliability between reviewers using the Cohen's  
50  
51 324 Kappa coefficient<sup>64</sup>.

### 52 325 **Stage 4: Charting of Information and Data**

53 326 Data will be extracted from every eligible article using a data extraction chart (**Charting**  
54  
55 327 **Table**) tailored to the research questions. Its aim is to maintain a manageable amount of data,  
56  
57 328 while ensuring a wide approach and breadth of coverage to obtain existing evidence on the  
58  
59 329 benefits and limitations associated with BPMN in patient care trajectory. Two researchers  
60  
61 330 (KSA and JBG or LL) will independently extract the following study information: authorship,  
62  
63 331 year of publication, country of origin, study purpose, patient care trajectory issues being  
64  
65 332 addressed (e.g., diabetes, chronic obstructive pulmonary disease, coronary heart disease,

1  
2  
3 333 clinical pathways for contraception), study population/target users (e.g., physicians, clinicians,  
4 334 nurses, pharmacists), setting/location of intervention (e.g., primary care, acute care,  
5 335 rehabilitation, home care, long-term care, community, hospital), methodological approach  
6 336 (qualitative, quantitative, or mixed study), expected results study findings (e.g., decreasing  
7 337 diagnostic delay, optimising of quality care, cost, reducing medical errors, standardising the  
8 338 decision-making process), type of outcomes/dimension analysed (e.g., diagnostic times,  
9 339 waiting time for surgery, flexibility, improving key performance indicators, decision support  
10 340 systems). We will note the objectives and benefits, as well as the limitations of using BPMN  
11 341 and BPMN-extension approach. The proposed Charting Table is shown in **online**  
12 342 **Supplementary Appendix II**. It will be trialled on five included articles and will be iteratively  
13 343 refined. Adjustments or expansions may also be made to the **Charting Table** if necessary to  
14 344 ensure that the research objectives or questions are well addressed. For instance, we may add  
15 345 additional categories of data deemed relevant to answer the research questions to the Charting  
16 346 Table.

#### 17 347 **Stage 5: Collating, Summarizing, and Reporting the Data**

18 348 The main findings of the included articles will be summarised in Tabular format in a manner  
19 349 that reflects the objectives of the review. Following the PCC principles<sup>40</sup>, a narrative summary  
20 350 will accompany the Tabular results and link the different findings to the review objective and  
21 351 questions and will identify any knowledge gaps in the literature. To ensure rigour in this stage,  
22 352 two reviewers (KSA and JBG or LL) will prepare a descriptive summary table of the extracted  
23 353 data and will highlight the key findings with input from the research team. The table will  
24 354 include a descriptive summary of the articles and a qualitative thematic analysis of the main  
25 355 results regarding characteristics of the BPMN approach used in each study (e.g., objective,  
26 356 benefit, challenges, target users, redesign the clinical process), type of patient trajectory,  
27 357 characteristics of the research designs, outcomes of interest used to measure the effectiveness  
28 358 of BPMN (e.g., reducing work time, and challenges and potential solutions learned). We will  
29 359 identify barriers or limitations of BPMN for achieving improvement of healthcare processes,  
30 360 support activities and decision-making processes, and use that information to address our main  
31 361 objectives. The consultation stage of the scoping review, described in the following section,  
32 362 will contribute to fulfilling that objective and to establish a conceptual framework for  
33 363 improving the use of BPMN in healthcare trajectory modelling. Finally, if the extracted data  
34 364 allow it, a qualitative analysis will be conducted to discuss or nuance the evidence of BPMN  
35 365 effectiveness considering potential barriers and enablers identified by the authors. We will use  
36 366 the PRISMA-ScR to guide the final reporting of our results.

## 367 **Stage 6: Consultation**

368 The final consultation stage offers an ideal mechanism to enhance the validity of the study  
369 outcome while translating findings with the stakeholders or health professionals and patients<sup>38</sup>.  
370 Preliminary findings from this review will provide the background for workshop with the  
371 research team and stakeholders/knowledge users (e.g., healthcare professionals, patients,  
372 decision-makers, administrators). The objectives of the workshop are to present and discuss  
373 the interim results of the synthesis. The meeting will generate a list of key practice  
374 recommendations, dissemination strategy and research priority areas to inform future research.

375 The workshop will be conducted with the research team with a focus on reviewing the results  
376 following feedback from the previous meeting, reviewing the final report, necessary  
377 modifications to findings and recommendations for precision and clarity. These consultations  
378 with all stakeholders, including clinicians, technicians, and patients, aim to materialise the  
379 findings of this review by discussing their applications in specific contexts. Therefore, despite  
380 Arksey and O'Malley<sup>37</sup> stated that consultation is optional, we find that our study is a  
381 fundamental step. Consequently, we plan to organise a workshop with all stakeholders in order  
382 to get their feedback on the findings and to develop next steps in research and practice. The  
383 feedback from the stakeholder workshop and the results of the scoping review will be combined  
384 to clearly indicate the available evidence, gaps in research and future research priorities for  
385 improving the use of BPMN in healthcare trajectory modelling.

### 386 **Patient and public involvement**

387 In this study, patient and public involvement will be performed at the consultation stage and  
388 dissemination. Patients will be recruited from the Institut Universitaire de Cardiologie et de  
389 Pneumologie de Québec - Université Laval (IUCPQ-UL). We will work together with the  
390 IUCPQ-UL patient office for the recruitment and consultation of patient partners. Our  
391 consultation strategy comprises involving not only patients with specific health trajectory but  
392 also caregivers, healthcare and social professionals, and policymakers at different levels. It is  
393 expected that their contribution in the discussion of the scoping review results will inform the  
394 next steps of the project regarding the ability of BPMN to effectively improve the quality of  
395 clinical practices, the security, and the fluidity of the care process. Therefore, our analysis will  
396 consider not only the operational outcomes of the application BPMN, but also its societal  
397 impact by considering the patient's health trajectory in healthcare organization.

### 398 **ETHICS AND DISSEMINATION**

399 This scoping review is exempt from ethics approval because the work carried out will be based  
400 on published documents. The involvement of relevant study participants does not imply



1  
2  
3 401 personal data collection, rather, we seek to have the key persons feedback on the information  
4  
5 402 gathered through the bibliographic review. The aim of this project is to synthesise the literature  
6  
7 403 about healthcare trajectory using BPMN approach to enhance conceptual clarity and  
8  
9 404 understanding about key benefits and limitations and to extrapolate from this evidence base  
10  
11 405 promising conceptual framework for improving the use of BPMN in healthcare trajectory.  
12  
13 406 During the development of the scoping review a patient-partner will be engaged as a consultant  
14  
15 407 and knowledge user. We anticipate the research will provide several key outputs including (1)  
16  
17 408 a comprehensive review that will summarize existing literature on the BPMN approach; (2) an  
18  
19 409 evidence base demonstrating the benefits and limitation of the BPMN approach in modelling  
20  
21 410 patient trajectory; (3) a list of BPMN extensions that can be used to improve its efficiency in  
22  
23 411 many domains; (4) a conceptual framework. Our findings will be disseminated in peer-  
24  
25 412 reviewed journals, workshop, seminars, and presentations and through discussions with  
26  
27 413 relevant organizations, study participants and stakeholders. Our goal will be to disseminate our  
28  
29 414 findings to a wide range of clinicians, leaders, and administrators in all sectors, to researchers  
30  
31 415 and to students entering the healthcare professions to enhance understanding about key benefits  
32  
33 416 and limitations of BPMN approach for optimising the patient trajectory. We believe the results  
34  
35 417 will benefit clinicians by guiding their decision-making throughout the patient's trajectory,  
36  
37 418 therefore reducing the medical error rate, optimising efficient resource management, and  
38  
39 419 reducing the risks of complications due to poor clinical decisions. Those improvements should  
40  
41 420 result in an optimisation of cost-efficiency for organizations and quality of care for patients.  
42  
43 421 **Contributors:** KSA, JBG and AC led the design, search strategy and conceptualisation of this  
44  
45 422 work and drafted the protocol. PL, FB, CL and CP were involved in the conceptualisation of  
46  
47 423 the review design, inclusion and exclusion criteria and provided feedback on the methodology  
48  
49 424 and the manuscript. KSA and LL were involved in data extraction forms. All authors provided  
50  
51 425 feedback on the manuscript and approval to the publishing of this protocol manuscript.  
52  
53 426 **Funding** None.  
54  
55 427 **Competing interests:** The authors declare no potential conflict of interest  
56  
57 428 **Patient and public involvement:** A patient-partner will be engaged throughout the study  
58  
59 429 acting as a consultant and knowledge user.  
60  
61 430 **Patient consent for publication:** Not required.  
62  
63 431 **Ethics approval:** Research ethics approval is not required for a scoping review.  
64  
65 432 **Provenance and peer review:** Not commissioned; externally peer reviewed.  
66  
67 433 **Acknowledgements:** The authors thank the IUCPQ-UL for the future collaboration with the  
68  
69 434 patient's groups. We also thank Nathalie Thibault, Director of Nurse care at IUCPQ-UL, and

3 435 Sophie Bellavance, Director of multidisciplinary services at IUCPQ-UL, for the availability in  
4 the collaboration within this project.

6 437

8 438

9 439

10 440

## Reference

12 441 1. McMahan M, Nadigel J, Thompson E, Glazier RH. Informing Canada's health system  
13 442 response to COVID-19: priorities for health services and policy research. *Healthcare*  
14 443 *Policy*. 2020;16(1):112.

15 444 2. Smylie J, Anderson M. Understanding the health of Indigenous peoples in Canada:  
16 445 key methodological and conceptual challenges. *Cmaj*. 2006;175(6):602-602.

17 446 3. Smylie J, Firestone M. Back to the basics: Identifying and addressing underlying  
18 447 challenges in achieving high quality and relevant health statistics for indigenous  
19 448 populations in Canada. *Statistical Journal of the IAOS*. 2015;31(1):67-87.

20 449 4. Cortada J, Gordon D, Lenihan B. The value of analytics in healthcare: From insights  
21 450 to outcomes. *IBM Global Business Services, Executive Report*. 2012.

22 451 5. Contandriopoulos D, Brousselle A, Larouche C, et al. Healthcare reforms, inertia  
23 452 polarization and group influence. *Health Policy*. 2018;122(9):1018-1027.

24 453 6. Himmelstein DU, Campbell T, Woolhandler S. Health care administrative costs in the  
25 454 United States and Canada, 2017. *Annals of internal medicine*. 2020;172(2):134-142.

26 455 7. Liu C, Tsugawa Y, Weiser TG, Scott JW, Spain DA, Maggard-Gibbons M.  
27 456 Association of the US Affordable Care Act with out-of-pocket spending and  
28 457 catastrophic health expenditures among adult patients with traumatic injury. *JAMA*  
29 458 *network open*. 2020;3(2):e200157-e200157.

30 459 8. Keehan SP, Cuckler GA, Poisal JA, et al. National Health Expenditure Projections,  
31 460 2019–28: Expected Rebound In Prices Drives Rising Spending Growth: National  
32 461 health expenditure projections for the period 2019–2028. *Health Affairs*.  
33 462 2020;39(4):704-714.

34 463 9. OCDE. *Health at a Glance 2021*. 2021.

35 464 10. Papanicolas I, Woskie LR, Jha AK. Health Care Spending in the United States and  
36 465 Other High-Income Countries. *JAMA*. 2018;319(10):1024-1039.

37 466 11. Emanuel EJ, Gudbranson E, Van Parys J, Gørtz M, Helgeland J, Skinner J.  
38 467 Comparing health outcomes of privileged US citizens with those of average residents  
39 468 of other developed countries. *JAMA internal medicine*. 2021;181(3):339-344.

40 469 12. Singh GK, Stella MY. Infant mortality in the United States, 1915-2017: large social  
41 470 inequalities have persisted for over a century. *International Journal of Maternal and*  
42 471 *Child Health and AIDS*. 2019;8(1):19.

43 472 13. Declercq E, Zephyrin L. Maternal mortality in the United States: a primer.  
44 473 *Commonwealth Fund*. 2020.

45 474 14. Hoyert DL. Maternal mortality rates in the United States, 2019. 2020.

46 475 15. Singh GK. Trends and social inequalities in maternal mortality in the United States,  
47 476 1969-2018. *International Journal of Maternal and Child Health and AIDS*.  
48 477 2021;10(1):29.

49 478 16. Cook JL, Majd M, Blake J, et al. Measuring Maternal Mortality and Morbidity in  
50 479 Canada. *J Obstet Gynaecol Can*. 2017;39(11):1028-1037.

51 480 17. Gauld R, Burgers J, Dobrow M, et al. Healthcare system performance improvement: a  
52 481 comparison of key policies in seven high-income countries. *Journal of health*  
53 482 *organization and management*. 2014.

- 1  
2  
3 483 18. Lee SE, Scott LD, Dahinten VS, Vincent C, Lopez KD, Park CG. Safety culture,  
4 484 patient safety, and quality of care outcomes: a literature review. *Western journal of*  
5 485 *nursing research*. 2019;41(2):279-304.
- 6 486 19. Kruk ME, Gage AD, Arsenault C, et al. High-quality health systems in the  
7 487 Sustainable Development Goals era: time for a revolution. *The Lancet global health*.  
8 488 2018;6(11):e1196-e1252.
- 9 489 20. Baker A. *Crossing the quality chasm: a new health system for the 21st century*. Vol  
10 490 323: British Medical Journal Publishing Group; 2001.
- 11 491 21. Wolfe A. Institute of Medicine report: crossing the quality chasm: a new health care  
12 492 system for the 21st century. *Policy, Politics, & Nursing Practice*. 2001;2(3):233-235.
- 13 493 22. National Academies of Sciences E, Medicine. Crossing the global quality chasm:  
14 494 Improving health care worldwide. 2018.
- 15 495 23. Organization WH. Framework on integrated, people-centred health services. *Geneva:*  
16 496 *World Health Organization*. 2016:2019.
- 17 497 24. Organization WH. WHO report on cancer: setting priorities, investing wisely and  
18 498 providing care for all. 2020.
- 19 499 25. Bergin RJ, Whitfield K, White V, et al. Optimal care pathways: A national policy to  
20 500 improve quality of cancer care and address inequalities in cancer outcomes. *Journal*  
21 501 *of cancer policy*. 2020;25:100245.
- 22 502 26. Allen D, Gillen E, Rixson L. Systematic review of the effectiveness of integrated care  
23 503 pathways: what works, for whom, in which circumstances? *International Journal of*  
24 504 *Evidence-Based Healthcare*. 2009;7(2):61-74.
- 25 505 27. Lodewijckx C, Sermeus W, Panella M, et al. Impact of care pathways for in-hospital  
26 506 management of COPD exacerbation: a systematic review. *International journal of*  
27 507 *nursing studies*. 2011;48(11):1445-1456.
- 28 508 28. Alkandari M, Ryan K, Hollywood A. The experiences of people living with  
29 509 peripheral neuropathy in Kuwait—a process map of the patient journey. *Pharmacy*.  
30 510 2019;7(3):127.
- 31 511 29. Ferreira AS, Oliveira GR. Business process modeling: A webibliomining perspective  
32 512 of architecture frameworks. *Independent Journal of Management & Production*.  
33 513 2019;10(3):1159-1183.
- 34 514 30. Ramudhin A, Bulgak AA, Fowler JG. A business process improvement study in a  
35 515 specialized North American hospital. Paper presented at: PICMET 2010  
36 516 TECHNOLOGY MANAGEMENT FOR GLOBAL ECONOMIC GROWTH2010.
- 37 517 31. Ramudhin A, Chan E, Mokadem A. A framework for the modelling, analysis and  
38 518 optimization of pathways in healthcare. Paper presented at: 2006 International  
39 519 Conference on Service Systems and Service Management2006.
- 40 520 32. Ramudhin A, Chan E, Benziane R, Mokadem A. Modeling and optimization of health  
41 521 care processes. Paper presented at: IIE Annual Conference. Proceedings2006.
- 42 522 33. Loya SR, Kawamoto K, Chatwin C, Huser V. Service oriented architecture for  
43 523 clinical decision support: A systematic review and future directions. *Journal of*  
44 524 *medical systems*. 2014;38(12):1-22.
- 45 525 34. Mincarone P, Leo CG, Trujillo-Martín MdM, et al. Standardized languages and  
46 526 notations for graphical modelling of patient care processes: a systematic review.  
47 527 *International Journal for Quality in Health Care*. 2018;30(3):169-177.
- 48 528 35. De Ramon Fernandez A, Ruiz Fernandez D, Sabuco Garcia Y. Business Process  
49 529 Management for optimizing clinical processes: A systematic literature review. *Health*  
50 530 *informatics journal*. 2020;26(2):1305-1320.
- 51 531 36. Zarour K, Benmerzoug D, Guermouche N, Drira K. A systematic literature review on  
52 532 BPMN extensions. *Business Process Management Journal*. 2019.

- 1  
2  
3 533 37. Arksey H, O'Malley L. Scoping studies: towards a methodological framework.  
4 534 *International journal of social research methodology*. 2005;8(1):19-32.
- 5 535 38. Levac D, Colquhoun H, O'Brien KK. Scoping studies: advancing the methodology.  
6 536 *Implementation science*. 2010;5(1):1-9.
- 7 537 39. Tricco AC, Lillie E, Zarin W, et al. A scoping review on the conduct and reporting of  
8 538 scoping reviews. *BMC medical research methodology*. 2016;16(1):1-10.
- 9 539 40. Peters MD, Godfrey C, McInerney P, Munn Z, Tricco AC, Khalil H. Chapter 11:  
10 540 scoping reviews (2020 version). *JBIM manual for evidence synthesis, JBIM*. 2020;2020.
- 11 541 41. Tricco AC, Lillie E, Zarin W, et al. PRISMA extension for scoping reviews  
12 542 (PRISMA-ScR): checklist and explanation. *Annals of internal medicine*.  
13 543 2018;169(7):467-473.
- 14 544 42. Abasse KS, Gartner J-B, Labbé L, et al. Benefits and Limitations of Business Process  
15 545 Model Notation in Modeling Patient Healthcare Trajectory: A Scoping Review  
16 546 Protocol. 2021.
- 17 547 43. Ponsignon F, Smart A, Phillips L. A customer journey perspective on service delivery  
18 548 system design: insights from healthcare. *International Journal of Quality &*  
19 549 *Reliability Management*. 2018.
- 20 550 44. Alexander GL. The nurse—patient trajectory framework. *Studies in health technology*  
21 551 *and informatics*. 2007;129(Pt 2):910.
- 22 552 45. Beauséjour M, Goulet L, Feldman DE, et al. Pathways of healthcare utilisation in  
23 553 patients with suspected adolescent idiopathic scoliosis: a cross-sectional study. *BMC*  
24 554 *health services research*. 2015;15(1):1-12.
- 25 555 46. Louis CJ, Clark JR, Gray B, Brannon D, Parker V. Service line structure and  
26 556 decision-maker attention in three health systems: Implications for patient-centered  
27 557 care. *Health care management review*. 2019;44(1):41-56.
- 28 558 47. Yang H, Li W, Liu K, Zhang J. Knowledge-based clinical pathway for medical  
29 559 quality improvement. *Information systems frontiers*. 2012;14(1):105-117.
- 30 560 48. De Bleser L, Depreitere R, WAELE KD, Vanhaecht K, Vlayen J, Sermeus W.  
31 561 Defining pathways. *Journal of nursing management*. 2006;14(7):553-563.
- 32 562 49. Aziz AFA, Nordin NAM, Ali MF, Abd Aziz NA, Sulong S, Aljunid SM. The  
33 563 integrated care pathway for post stroke patients (iCaPPS): a shared care approach  
34 564 between stakeholders in areas with limited access to specialist stroke care services.  
35 565 *BMC health services research*. 2017;17(1):1-11.
- 36 566 50. Busari JO, Yaldiz H, Gans RO, Duits AJ. Clinical Leadership as an Agent for  
37 567 Change: A Health System Improvement Intervention in Curaçao. *Journal of*  
38 568 *multidisciplinary healthcare*. 2020;13:787.
- 39 569 51. Seguin ML, Rangnekar A, Renedo A, Palafox B, McKee M, Balabanova D.  
40 570 Systematic review of frameworks used to conceptualise health pathways of  
41 571 individuals diagnosed with cardiovascular diseases. *BMJ global health*.  
42 572 2020;5(9):e002464.
- 43 573 52. Valentijn PP, Biermann C, Bruijnzeels MA. Value-based integrated (renal) care:  
44 574 setting a development agenda for research and implementation strategies. *BMC health*  
45 575 *services research*. 2016;16(1):1-11.
- 46 576 53. Elkhuisen SG, Vissers JM, Mahdavi M, Van De Klundert JJ. Modeling Patient  
47 577 Journeys for Demand Segments in Chronic Care, With an Illustration to Type 2  
48 578 Diabetes. *Frontiers in Public Health*. 2020;8.
- 49 579 54. Fung-Kee-Fung M, Maziak D, Pantarotto J, et al. Regional process redesign of lung  
50 580 cancer care: a learning health system pilot project. *Current Oncology*. 2018;25(1):59-  
51 581 66.



- 1  
2  
3 582 55. Mohr P, Galderisi S, Boyer P, et al. Value of schizophrenia treatment I: The patient  
4 583 journey. *European Psychiatry*. 2018;53:107-115.
- 5 584 56. Combi C, Oliboni B, Zardiniy A, Zerbato F. Seamless design of decision-intensive  
6 585 care pathways. Paper presented at: 2016 IEEE International Conference on Healthcare  
7 586 Informatics (ICHI)2016.
- 8 587 57. Cánovas-Segura B, Zerbato F, Oliboni B, et al. A process-oriented approach for  
9 588 supporting clinical decisions for infection management. Paper presented at: 2017  
10 589 IEEE International Conference on Healthcare Informatics (ICHI)2017.
- 11 590 58. Hewelt M, Kunde A, Weske M, Meinel C. Recommendations for medical treatment  
12 591 processes: the PIGS approach. Paper presented at: International Conference on  
13 592 Business Process Management2014.
- 14 593 59. de Bruin JS, Adlassnig K-P, Leitich H, Rappelsberger A. Separating business logic  
15 594 from medical knowledge in digital clinical workflows using business process model  
16 595 and notation and arden syntax. In: *Health Informatics Meets eHealth*. IOS Press;  
17 596 2018:17-24.
- 18 597 60. Wohlin C. Guidelines for snowballing in systematic literature studies and a replication  
19 598 in software engineering. Paper presented at: Proceedings of the 18th international  
20 599 conference on evaluation and assessment in software engineering2014.
- 21 600 61. Tomaskova H, Kopecky M. Specialization of Business Process Model and Notation  
22 601 Applications in Medicine—A Review. *Data*. 2020;5(4):99.
- 23 602 62. Babineau J. Product review: covidence (systematic review software). *Journal of the*  
24 603 *Canadian Health Libraries Association/Journal de l'Association des bibliothèques de*  
25 604 *la santé du Canada*. 2014;35(2):68-71.
- 26 605 63. Kellermeyer L, Harnke B, Knight S. Covidence and Rayyan. *Journal of the Medical*  
27 606 *Library Association: JMLA*. 2018;106(4):580.
- 28 607 64. McHugh ML. Interrater reliability: the kappa statistic. *Biochemia medica*.  
29 608 2012;22(3):276-282.  
30  
31  
32  
33  
34 609  
35  
36  
37  
38  
39  
40  
41  
42  
43  
44  
45  
46  
47  
48  
49  
50  
51  
52  
53  
54  
55  
56  
57  
58  
59  
60

## Supplementary materials – Databases search strategy

### Medline (Ovid)

Date of the search: 09-12-2021

Database limit: We limited the results to publications between 01-01-2004 and 09-12-2021

| # | Search strategy                                                                                                                                                                                                                                                                                      | Results |
|---|------------------------------------------------------------------------------------------------------------------------------------------------------------------------------------------------------------------------------------------------------------------------------------------------------|---------|
| 1 | ("Business Process*" adj1 (Model* OR Method? OR management)).ti,ab,kw,kf OR "Decision Model* notation".ti,ab,kw,kf OR BPMN*.ti,ab,kw,kf OR BPM.ti,kw,kf                                                                                                                                              | 285     |
| 2 | Critical Pathways/ OR Practice Guidelines as Topic/ OR Workflow/ OR Clinical Decision-Making/ OR Decision Support Systems, Clinical/ OR Patient Care Management/                                                                                                                                     | 163743  |
| 3 | (Decision adj1 (making OR support)).ti,ab,kw OR ((clinical OR medical OR healthcare OR "health care") adj2 process*).ti,ab,kw OR ((healthcare OR clinical OR critical OR care) adj2 path*).ti,ab,kw OR guideline*.ti,ab,kw OR Workflow*.ti,ab,kw OR careflow*.ti,ab,kw OR "patient journey".ti,ab,kw | 686144  |
| 4 | 2 or 3                                                                                                                                                                                                                                                                                               | 769504  |
| 5 | 1 and 4                                                                                                                                                                                                                                                                                              | 99      |
| 6 | limit 5 to ed=20040101-20211209                                                                                                                                                                                                                                                                      | 85      |

### Embase (Embase.com)

Date of the search: 09-12-2021

Database limit: We limited the results to publications between 01-01-2004 and 09-12-2021

| # | Search strategy                                                                                                                                                                                                                                                                                                                                                  | Results   |
|---|------------------------------------------------------------------------------------------------------------------------------------------------------------------------------------------------------------------------------------------------------------------------------------------------------------------------------------------------------------------|-----------|
| 1 | ("Business Process*" NEAR/1 (Model* OR Method\$ OR management)):ti,ab,kw OR "Decision Model* notation":ti,ab,kw OR BPMN*:ti,ab,kw OR BPM:ti,kw                                                                                                                                                                                                                   | 368       |
| 2 | 'practice guideline'/de OR 'clinical pathway'/de OR 'clinical protocol'/de OR 'workflow'/de OR 'decision support system'/exp OR 'clinical decision making'/de                                                                                                                                                                                                    | 681,799   |
| 3 | (Decision NEAR/1 (making OR support)):ti,ab,kw OR ((clinical OR medical OR healthcare OR "health care" OR "Patient care") NEAR/2 process*).ti,ab,kw OR ((healthcare OR clinical OR critical OR care) NEAR/2 path*).ti,ab,kw OR guideline*:ti,ab,kw OR Workflow*:ti,ab,kw OR careflow*:ti,ab,kw OR "patient journey":ti,ab,kw OR "Healthcare trajectory":ti,ab,kw | 1,040,782 |
| 4 | #2 OR #3                                                                                                                                                                                                                                                                                                                                                         | 1,381,760 |
| 5 | #1 AND #4                                                                                                                                                                                                                                                                                                                                                        | 117       |
| 6 | #5 AND [01-01-2004]/sd                                                                                                                                                                                                                                                                                                                                           | 112       |

### Academic Search Premier

Date of the search: 09-12-2021

Database limit: We limited the results to publications between 01-01-2004 and 09-12-2021

| # | Search strategy                                                                                                                                                                                                                                                                                                                                                                           | Results |
|---|-------------------------------------------------------------------------------------------------------------------------------------------------------------------------------------------------------------------------------------------------------------------------------------------------------------------------------------------------------------------------------------------|---------|
| 1 | TI ("Business Process*" N1 (Model* OR Method# OR management)) OR TI "Decision Model* notation" OR TI BPMN* OR TI BPM OR AB ("Business Process*" N1 (Model* OR Method# OR management)) OR AB "Decision Model* notation" OR AB BPMN* OR KW ("Business Process*" N1 (Model* OR Method# OR management)) OR KW "Decision Model* notation" OR KW BPMN* OR KW BPM                                | 2,229   |
| 2 | DE GUIDELINES OR DE "DECISION support systems" OR DE "DECISION making" OR DE "MEDICAL protocols" OR DE "WORKFLOW" OR DE "PATIENT management"                                                                                                                                                                                                                                              | 180,673 |
| 3 | TI (Decision N1 (making OR support)) OR TI ((clinical OR medical OR healthcare OR "health care" OR "Patient care") N2 process*) OR TI ((healthcare OR clinical OR critical OR care) N2 path*) OR TI guideline* OR TI Workflow* OR TI careflow* OR TI "patient journey" OR TI "Healthcare trajectory" OR AB (Decision N1 (making OR support)) OR AB ((clinical OR medical OR healthcare OR | 596,181 |



|   |                                                                                                                                                                                                                                                                                                                                                                                                                                                                                                                            |         |
|---|----------------------------------------------------------------------------------------------------------------------------------------------------------------------------------------------------------------------------------------------------------------------------------------------------------------------------------------------------------------------------------------------------------------------------------------------------------------------------------------------------------------------------|---------|
|   | "health care" OR "PaABent care") N2 process*) OR AB ((healthcare OR clinical OR criABcal OR care) N2 path*) OR AB guideline* OR AB Workflow* OR AB careflow* OR AB "paABent journey" OR AB "Healthcare trajectory" OR KW (Decision N1 (making OR support)) OR KW ((clinical OR medical OR healthcare OR "health care" OR "PaKwent care") N2 process*) OR KW ((healthcare OR clinical OR criKWcal OR care) N2 path*) OR KW guideline* OR KW Workflow* OR KW careflow* OR KW "paKwent journey" OR KW "Healthcare trajectory" |         |
| 4 | S2 OR S3                                                                                                                                                                                                                                                                                                                                                                                                                                                                                                                   | 664,934 |
| 5 | S1 AND S4                                                                                                                                                                                                                                                                                                                                                                                                                                                                                                                  | 390     |
| 6 | S5 AND DT 20040101-20211209                                                                                                                                                                                                                                                                                                                                                                                                                                                                                                | 359     |

### ABI/Inform (ProQuest)

Date of the search: 09-12-2021

Database limit: We limited the results to peer review publications between 01-01-2004 and 09-12-2021

| # | Search strategy                                                                                                                                                                                                                                                                                                                             | Results |
|---|---------------------------------------------------------------------------------------------------------------------------------------------------------------------------------------------------------------------------------------------------------------------------------------------------------------------------------------------|---------|
| 1 | TI,AB(("Business Process*" NEAR/1 (Model* OR Method? OR management)) OR "Decision Model* notation" OR BPMN*) OR TI(BPM)                                                                                                                                                                                                                     | 3 110   |
| 2 | SU("Patient care planning") OR SU("Guidelines") OR SU("Decision support systems") OR SU("Decision making")                                                                                                                                                                                                                                  | 305 337 |
| 3 | TI,AB(Decision NEAR/1 (making OR support)) OR TI,AB((clinical OR medical OR healthcare OR "health care" OR "Patient care") NEAR/2 process*) OR TI,AB((healthcare OR clinical OR critical OR care) NEAR/2 path*) OR TI,AB(guideline*) OR TI,AB(Workflow*) OR TI,AB(careflow*) OR TI,AB("patient journey") OR TI,AB("Healthcare trajectory")) | 229 017 |
| 4 | 2 OR 3                                                                                                                                                                                                                                                                                                                                      | 447 323 |
| 5 | 1 AND 4                                                                                                                                                                                                                                                                                                                                     | 668     |
| 6 | 5 AND YR(2004-2021)                                                                                                                                                                                                                                                                                                                         | 553     |
| 7 | Peer review publications only limit                                                                                                                                                                                                                                                                                                         | 311     |

### Web of Science

Date of the search: 09-12-2021

Database limit: We limited the results to publications between 01-01-2004 and 09-12-2021

| # | Search strategy                                                                                                                                                                                                                                                                                                     | Results |
|---|---------------------------------------------------------------------------------------------------------------------------------------------------------------------------------------------------------------------------------------------------------------------------------------------------------------------|---------|
| 1 | TS=("Business Process*" NEAR/1 (Model* OR Method\$ OR management)) OR TS="Decision Model* notation" OR TS=BPMN* OR TI=BPM OR KP=BPM OR AK=BPM                                                                                                                                                                       | 9,832   |
| 2 | TS=("patient decision" NEAR/1 (making OR support)) OR TS=((clinical OR medical OR healthcare OR "health care" OR "Patient care") NEAR/2 process*) OR TS=((healthcare OR clinical OR critical OR care) NEAR/2 path*) OR TS=(guideline*) OR TS=(careflow*) OR TS=("patient journey") OR TS=("Healthcare trajectory")) | 692,475 |
| 3 | #1 AND #2                                                                                                                                                                                                                                                                                                           | 475     |

### Google Scholar (<https://harzing.com/resources/publish-or-perish>)

Date of the search: 09-12-2021

Database limit: only up to the 20 first results per string have been considered; publications between 2004 and 2021 limit has been applied; citations and patents options have been removed

| # | Search                                                                                                          | # Results screened |
|---|-----------------------------------------------------------------------------------------------------------------|--------------------|
| 1 | ("Business Process Model" OR "Business Process Modelling" OR "Business Process Modeling") AND "patient journey" | 20                 |

|    |    |                                                                                                                                                        |            |
|----|----|--------------------------------------------------------------------------------------------------------------------------------------------------------|------------|
| 1  | 2  | ("Business Process Model" OR "Business Process Modelling" OR "Business Process Modeling" OR "Business Process management") AND "clinical pathways"     | 20         |
| 2  | 3  | ("Business Process Model" OR "Business Process Modelling" OR "Business Process Modeling" OR "Business Process management") AND "critical pathways"     | 20         |
| 3  | 4  | ("Business Process Model" OR "Business Process Modelling" OR "Business Process Modeling" OR "Business Process management") AND "healthcare pathways"   | 20         |
| 4  | 5  | ("Business Process Model" OR "Business Process Modelling" OR "Business Process Modeling" OR "Business Process management") AND "clinical process"      | 20         |
| 5  | 6  | ("Business Process Model" OR "Business Process Modelling" OR "Business Process Modeling" OR "Business Process management") AND "medical process"       | 20         |
| 6  | 7  | ("Business Process Model" OR "Business Process Modelling" OR "Business Process Modeling" OR "Business Process management") AND "healthcare process"    | 20         |
| 7  | 8  | ("Business Process Model" OR "Business Process Modelling" OR "Business Process Modeling" OR "Business Process management") AND "health care process"   | 20         |
| 8  | 9  | ("Business Process Model" OR "Business Process Modelling" OR "Business Process Modeling" OR "Business Process management") AND guideline               | 20         |
| 9  | 10 | ("Business Process Model" OR "Business Process Modelling" OR "Business Process Modeling" OR "Business Process management") AND guidelines              | 20         |
| 10 | 11 | ("Business Process Model" OR "Business Process Modelling" OR "Business Process Modeling" OR "Business Process management") AND "decision support"      | 20         |
| 11 | 12 | ("Business Process Model" OR "Business Process Modelling" OR "Business Process Modeling" OR "Business Process management") AND "Healthcare trajectory" | 1          |
| 12 |    | <b>Total number of results</b>                                                                                                                         | <b>221</b> |
