# Supplementary material for: Benefits and limitations of business process model notation in modelling patient healthcare trajectory: a scoping review protocol
Source: HighWire-hosted journal article supplement (doi:10.1136/bmjopen-2021-060357), 2022-05-01
Supplement: bmjopen-2021-060357supp001_data_supplement.pdf [file bmjopen-2021-060357supp001_data_supplement.pdf]

## Supplementary materials – Databases search strategy

### Medline (Ovid)

Date of the search: 09-12-2021

Database limit: We limited the results to publications between 01-01-2004 and 09-12-2021

| # | Search strategy                                                                                                                                                                                                                                                                                      | Results |
|---|------------------------------------------------------------------------------------------------------------------------------------------------------------------------------------------------------------------------------------------------------------------------------------------------------|---------|
| 1 | ("Business Process*" adj1 (Model* OR Method? OR management)).ti,ab,kw,kf OR "Decision Model* notation".ti,ab,kw,kf OR BPMN*.ti,ab,kw,kf OR BPM.ti,kw,kf                                                                                                                                              | 285     |
| 2 | Critical Pathways/ OR Practice Guidelines as Topic/ OR Workflow/ OR Clinical Decision-Making/ OR Decision Support Systems, Clinical/ OR Patient Care Management/                                                                                                                                     | 163743  |
| 3 | (Decision adj1 (making OR support)).ti,ab,kw OR ((clinical OR medical OR healthcare OR "health care") adj2 process*).ti,ab,kw OR ((healthcare OR clinical OR critical OR care) adj2 path*).ti,ab,kw OR guideline*.ti,ab,kw OR Workflow*.ti,ab,kw OR careflow*.ti,ab,kw OR "patient journey".ti,ab,kw | 686144  |
| 4 | 2 or 3                                                                                                                                                                                                                                                                                               | 769504  |
| 5 | 1 and 4                                                                                                                                                                                                                                                                                              | 99      |
| 6 | limit 5 to ed=20040101-20211209                                                                                                                                                                                                                                                                      | 85      |

### Embase (Embase.com)

Date of the search: 09-12-2021

Database limit: We limited the results to publications between 01-01-2004 and 09-12-2021

| # | Search strategy                                                                                                                                                                                                                                                                                                                                                  | Results   |
|---|------------------------------------------------------------------------------------------------------------------------------------------------------------------------------------------------------------------------------------------------------------------------------------------------------------------------------------------------------------------|-----------|
| 1 | ("Business Process*" NEAR/1 (Model* OR Method\$ OR management)):ti,ab,kw OR "Decision Model* notation":ti,ab,kw OR BPMN*:ti,ab,kw OR BPM:ti,kw                                                                                                                                                                                                                   | 368       |
| 2 | 'practice guideline'/de OR 'clinical pathway'/de OR 'clinical protocol'/de OR 'workflow'/de OR 'decision support system'/exp OR 'clinical decision making'/de                                                                                                                                                                                                    | 681,799   |
| 3 | (Decision NEAR/1 (making OR support)):ti,ab,kw OR ((clinical OR medical OR healthcare OR "health care" OR "Patient care") NEAR/2 process*).ti,ab,kw OR ((healthcare OR clinical OR critical OR care) NEAR/2 path*).ti,ab,kw OR guideline*.ti,ab,kw OR Workflow*.ti,ab,kw OR careflow*.ti,ab,kw OR "patient journey":ti,ab,kw OR "Healthcare trajectory":ti,ab,kw | 1,040,782 |
| 4 | #2 OR #3                                                                                                                                                                                                                                                                                                                                                         | 1,381,760 |
| 5 | #1 AND #4                                                                                                                                                                                                                                                                                                                                                        | 117       |
| 6 | #5 AND [01-01-2004]/sd                                                                                                                                                                                                                                                                                                                                           | 112       |

### Academic Search Premier

Date of the search: 09-12-2021

Database limit: We limited the results to publications between 01-01-2004 and 09-12-2021

| # | Search strategy                                                                                                                                                                                                                                                                                                                                                                           | Results |
|---|-------------------------------------------------------------------------------------------------------------------------------------------------------------------------------------------------------------------------------------------------------------------------------------------------------------------------------------------------------------------------------------------|---------|
| 1 | TI ("Business Process*" N1 (Model* OR Method# OR management)) OR TI "Decision Model* notation" OR TI BPMN* OR TI BPM OR AB ("Business Process*" N1 (Model* OR Method# OR management)) OR AB "Decision Model* notation" OR AB BPMN* OR KW ("Business Process*" N1 (Model* OR Method# OR management)) OR KW "Decision Model* notation" OR KW BPMN* OR KW BPM                                | 2,229   |
| 2 | DE GUIDELINES OR DE "DECISION support systems" OR DE "DECISION making" OR DE "MEDICAL protocols" OR DE "WORKFLOW" OR DE "PATIENT management"                                                                                                                                                                                                                                              | 180,673 |
| 3 | TI (Decision N1 (making OR support)) OR TI ((clinical OR medical OR healthcare OR "health care" OR "Patient care") N2 process*) OR TI ((healthcare OR clinical OR critical OR care) N2 path*) OR TI guideline* OR TI Workflow* OR TI careflow* OR TI "patient journey" OR TI "Healthcare trajectory" OR AB (Decision N1 (making OR support)) OR AB ((clinical OR medical OR healthcare OR | 596,181 |

|   |                                                                                                                                                                                                                                                                                                                                                                                                                                                                                                                            |         |
|---|----------------------------------------------------------------------------------------------------------------------------------------------------------------------------------------------------------------------------------------------------------------------------------------------------------------------------------------------------------------------------------------------------------------------------------------------------------------------------------------------------------------------------|---------|
|   | "health care" OR "PaABent care") N2 process*) OR AB ((healthcare OR clinical OR criABcal OR care) N2 path*) OR AB guideline* OR AB Workflow* OR AB careflow* OR AB "paABent journey" OR AB "Healthcare trajectory" OR KW (Decision N1 (making OR support)) OR KW ((clinical OR medical OR healthcare OR "health care" OR "PaKwent care") N2 process*) OR KW ((healthcare OR clinical OR criKWcal OR care) N2 path*) OR KW guideline* OR KW Workflow* OR KW careflow* OR KW "paKwent journey" OR KW "Healthcare trajectory" |         |
| 4 | S2 OR S3                                                                                                                                                                                                                                                                                                                                                                                                                                                                                                                   | 664,934 |
| 5 | S1 AND S4                                                                                                                                                                                                                                                                                                                                                                                                                                                                                                                  | 390     |
| 6 | S5 AND DT 20040101-20211209                                                                                                                                                                                                                                                                                                                                                                                                                                                                                                | 359     |

**ABI/Inform (ProQuest)**

Date of the search: 09-12-2021

Database limit: We limited the results to peer review publications between 01-01-2004 and 09-12-2021

| # | Search strategy                                                                                                                                                                                                                                                                                                                             | Results |
|---|---------------------------------------------------------------------------------------------------------------------------------------------------------------------------------------------------------------------------------------------------------------------------------------------------------------------------------------------|---------|
| 1 | TI,AB(("Business Process*" NEAR/1 (Model* OR Method? OR management)) OR "Decision Model* notation" OR BPMN*) OR TI(BPM)                                                                                                                                                                                                                     | 3 110   |
| 2 | SU("Patient care planning") OR SU("Guidelines") OR SU("Decision support systems") OR SU("Decision making")                                                                                                                                                                                                                                  | 305 337 |
| 3 | TI,AB(Decision NEAR/1 (making OR support)) OR TI,AB((clinical OR medical OR healthcare OR "health care" OR "Patient care") NEAR/2 process*) OR TI,AB((healthcare OR clinical OR critical OR care) NEAR/2 path*) OR TI,AB(guideline*) OR TI,AB(Workflow*) OR TI,AB(careflow*) OR TI,AB("patient journey") OR TI,AB("Healthcare trajectory")) | 229 017 |
| 4 | 2 OR 3                                                                                                                                                                                                                                                                                                                                      | 447 323 |
| 5 | 1 AND 4                                                                                                                                                                                                                                                                                                                                     | 668     |
| 6 | 5 AND YR(2004-2021)                                                                                                                                                                                                                                                                                                                         | 553     |
| 7 | Peer review publications only limit                                                                                                                                                                                                                                                                                                         | 311     |

**Web of Science**

Date of the search: 09-12-2021

Database limit: We limited the results to publications between 01-01-2004 and 09-12-2021

| # | Search strategy                                                                                                                                                                                                                                                                                                     | Results |
|---|---------------------------------------------------------------------------------------------------------------------------------------------------------------------------------------------------------------------------------------------------------------------------------------------------------------------|---------|
| 1 | TS=("Business Process*" NEAR/1 (Model* OR Method\$ OR management)) OR TS="Decision Model* notation" OR TS=BPMN* OR TI=BPM OR KP=BPM OR AK=BPM                                                                                                                                                                       | 9,832   |
| 2 | TS=("patient decision" NEAR/1 (making OR support)) OR TS=((clinical OR medical OR healthcare OR "health care" OR "Patient care") NEAR/2 process*) OR TS=((healthcare OR clinical OR critical OR care) NEAR/2 path*) OR TS=(guideline*) OR TS=(careflow*) OR TS=("patient journey") OR TS=("Healthcare trajectory")) | 692,475 |
| 3 | #1 AND #2                                                                                                                                                                                                                                                                                                           | 475     |

**Google Scholar (<https://harzing.com/resources/publish-or-perish>)**

Date of the search: 09-12-2021

Database limit: only up to the 20 first results per string have been considered; publications between 2004 and 2021 limit has been applied; citations and patents options have been removed

| # | Search                                                                                                          | # Results screened |
|---|-----------------------------------------------------------------------------------------------------------------|--------------------|
| 1 | ("Business Process Model" OR "Business Process Modelling" OR "Business Process Modeling") AND "patient journey" | 20                 |

|                                |                                                                                                                                                        |            |
|--------------------------------|--------------------------------------------------------------------------------------------------------------------------------------------------------|------------|
| 2                              | ("Business Process Model" OR "Business Process Modelling" OR "Business Process Modeling" OR "Business Process management") AND "clinical pathways"     | 20         |
| 3                              | ("Business Process Model" OR "Business Process Modelling" OR "Business Process Modeling" OR "Business Process management") AND "critical pathways"     | 20         |
| 4                              | ("Business Process Model" OR "Business Process Modelling" OR "Business Process Modeling" OR "Business Process management") AND "healthcare pathways"   | 20         |
| 5                              | ("Business Process Model" OR "Business Process Modelling" OR "Business Process Modeling" OR "Business Process management") AND "clinical process"      | 20         |
| 6                              | ("Business Process Model" OR "Business Process Modelling" OR "Business Process Modeling" OR "Business Process management") AND "medical process"       | 20         |
| 7                              | ("Business Process Model" OR "Business Process Modelling" OR "Business Process Modeling" OR "Business Process management") AND "healthcare process"    | 20         |
| 8                              | ("Business Process Model" OR "Business Process Modelling" OR "Business Process Modeling" OR "Business Process management") AND "health care process"   | 20         |
| 9                              | ("Business Process Model" OR "Business Process Modelling" OR "Business Process Modeling" OR "Business Process management") AND guideline               | 20         |
| 10                             | ("Business Process Model" OR "Business Process Modelling" OR "Business Process Modeling" OR "Business Process management") AND guidelines              | 20         |
| 11                             | ("Business Process Model" OR "Business Process Modelling" OR "Business Process Modeling" OR "Business Process management") AND "decision support"      | 20         |
| 12                             | ("Business Process Model" OR "Business Process Modelling" OR "Business Process Modeling" OR "Business Process management") AND "Healthcare trajectory" | 1          |
| <b>Total number of results</b> |                                                                                                                                                        | <b>221</b> |
